# Supplementary material
Source: PubMed Central journal article supplement (PMC2590935)

# Redox-Triggered Contents Release from Liposomes

Winston Ong, Yuming Yang, Angela C. Cruciano and Robin L. McCarley\*

## Supporting Information

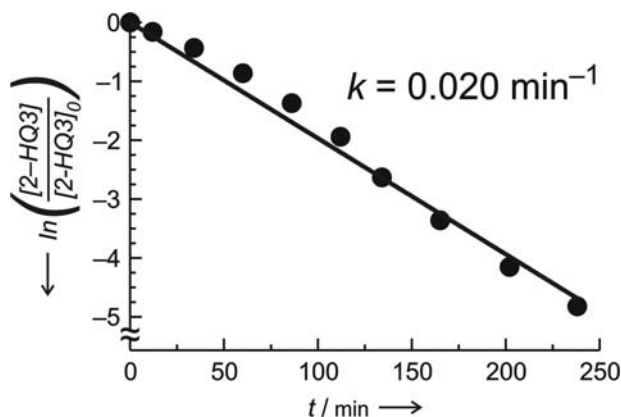

**Figure S1.** Time-dependent release of **3-HQ** from **2-HQ3** in 0.1 M phosphate buffer (pD = 7). Line shows the best fit to the experimental data. Experimental details have been previously reported<sup>52</sup>.

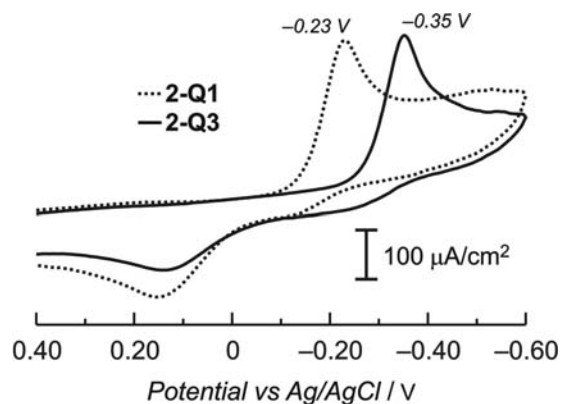

**Figure S2.** Cyclic voltammograms of **2-Q1** ( $1.0 \times 10^{-3} \text{ M}$ ) and **2-Q3** ( $1.0 \times 10^{-3} \text{ M}$ ) in 0.1 M phosphate buffer, pH 7.1 at ambient temperature using a glassy carbon electrode (diameter = 3 mm). Scan rate =  $0.1 \text{ V s}^{-1}$ . The cathodic peak potentials for the two-electron reduction of each lipid are shown.

GC-MS Data for 3-HQ1

Print Date: 24 Oct 2006 22:38

MS Data Review All Plots - 10/24/06 11:22

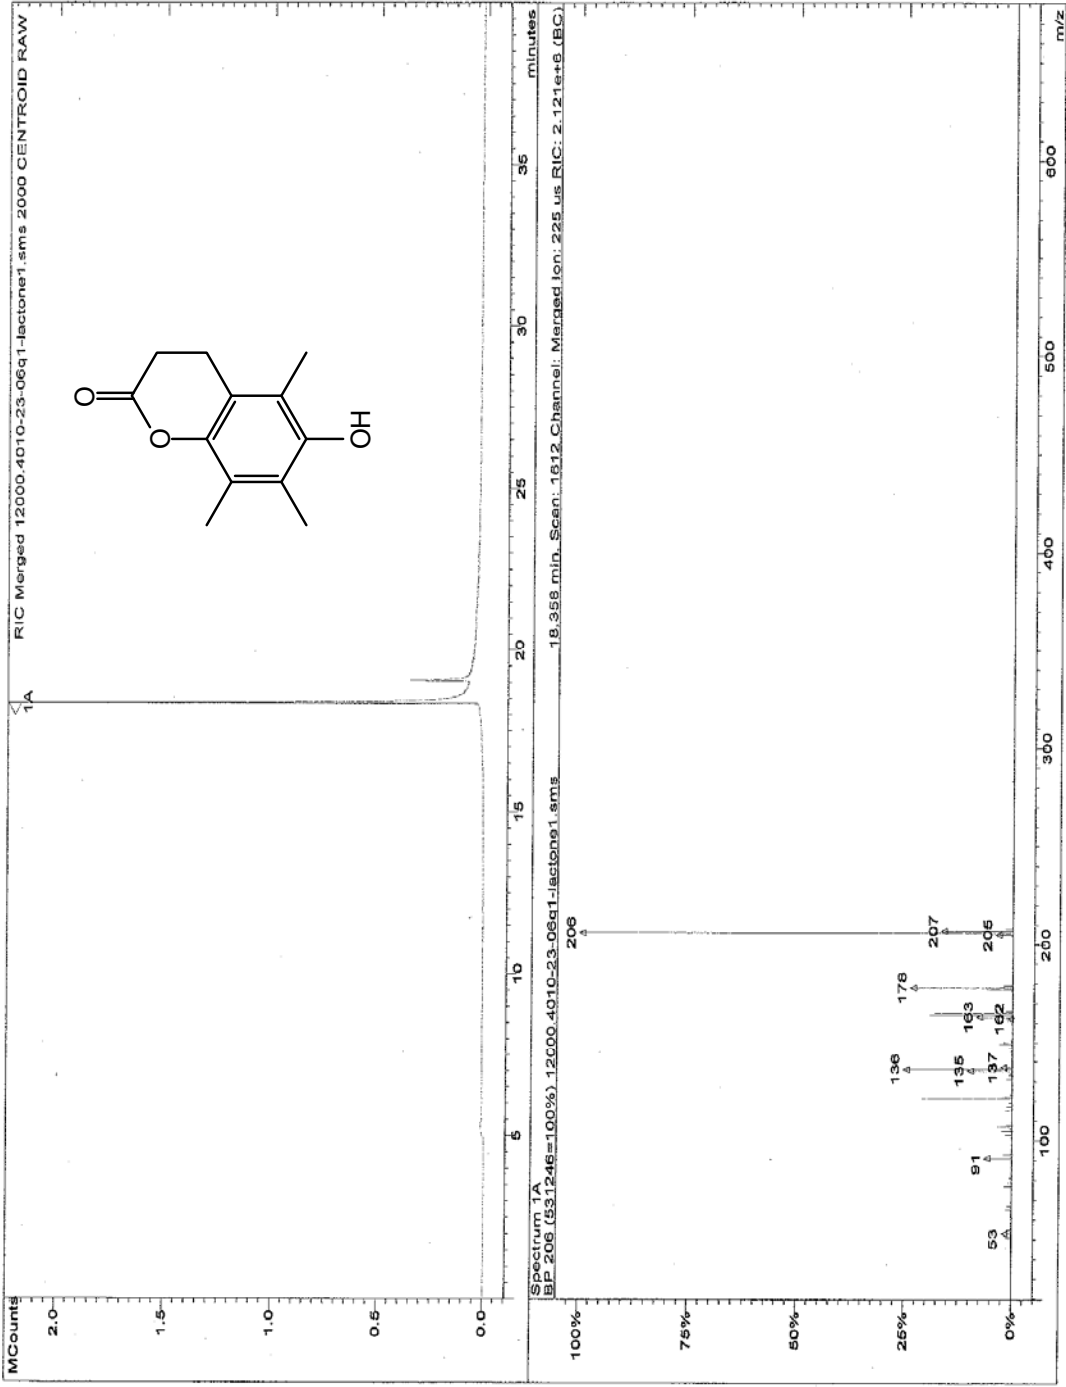

HR-ESI-ToF-MS Data for 3-HQ1

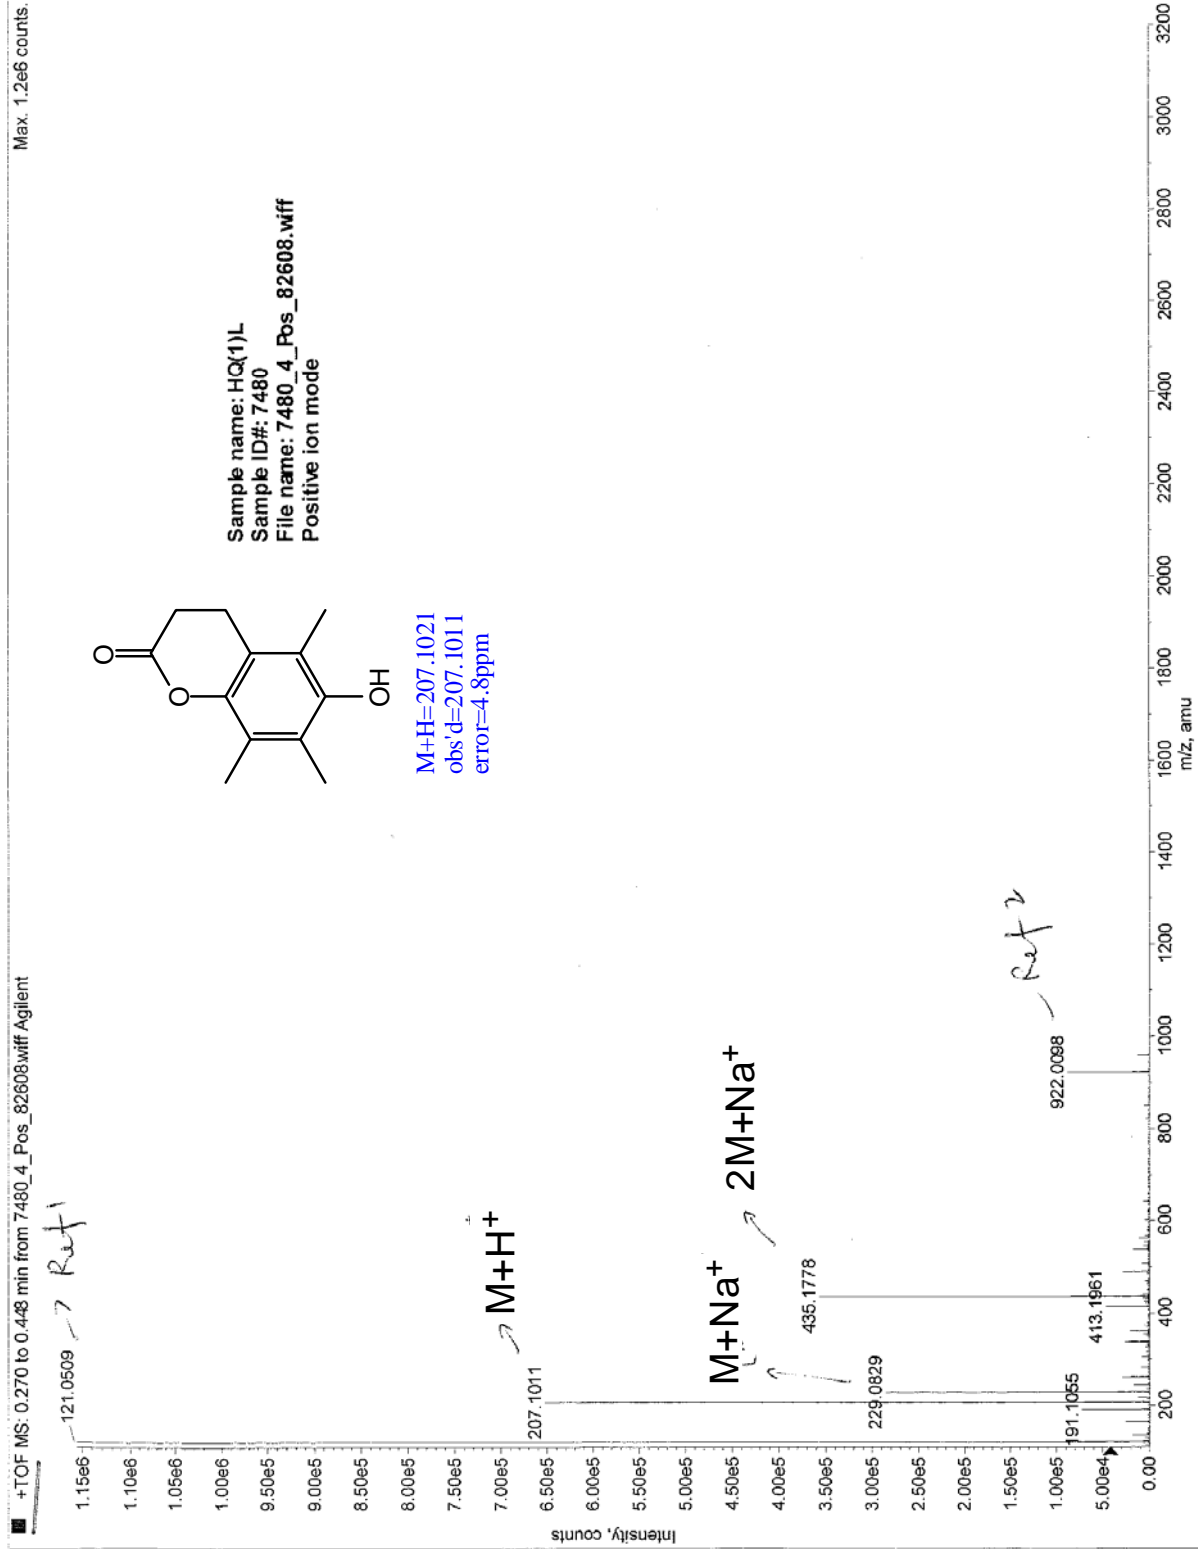

# <sup>1</sup>H NMR Spectral Data for 3-HQ1

Current Data Parameters  
 NAME Q1C-lactone  
 EXPNO 1  
 PROCNO 1

F2 - Acquisition Parameters

Date\_ 20061019  
 Time 17.30  
 INSTRUM spect  
 PROBED 5 mm Multi  
 PULPROG zg30  
 TD 27026  
 SOLVENT CDCl3  
 NS 16  
 DS 2  
 SWH 4504.504 Hz  
 FIDRES 0.166673 Hz  
 AQ 2.9999361 sec  
 RG 4096  
 DW 111.600 usec  
 DE 158.57 usec  
 TE 305.0 K  
 D1 2.0000000 sec  
 E1 6.95 usec  
 SFO1 500.1312003 MHz  
 NUCLEUS 1H

F2 - Processing parameters

SI 65536  
 SF 300.1300040 MHz  
 EM  
 NDW 0  
 SSB 0  
 LB 0.20 Hz  
 GB 0  
 PC 1.00

ID NMR plot parameters

CX 18.00 cm  
 F1P 5.000 ppm  
 F1 1500.65 Hz  
 F2P 1.000 ppm  
 F2 300.13 Hz  
 FREQM 0.22222 ppm/cm  
 HZCM 66.65356 Hz/cm

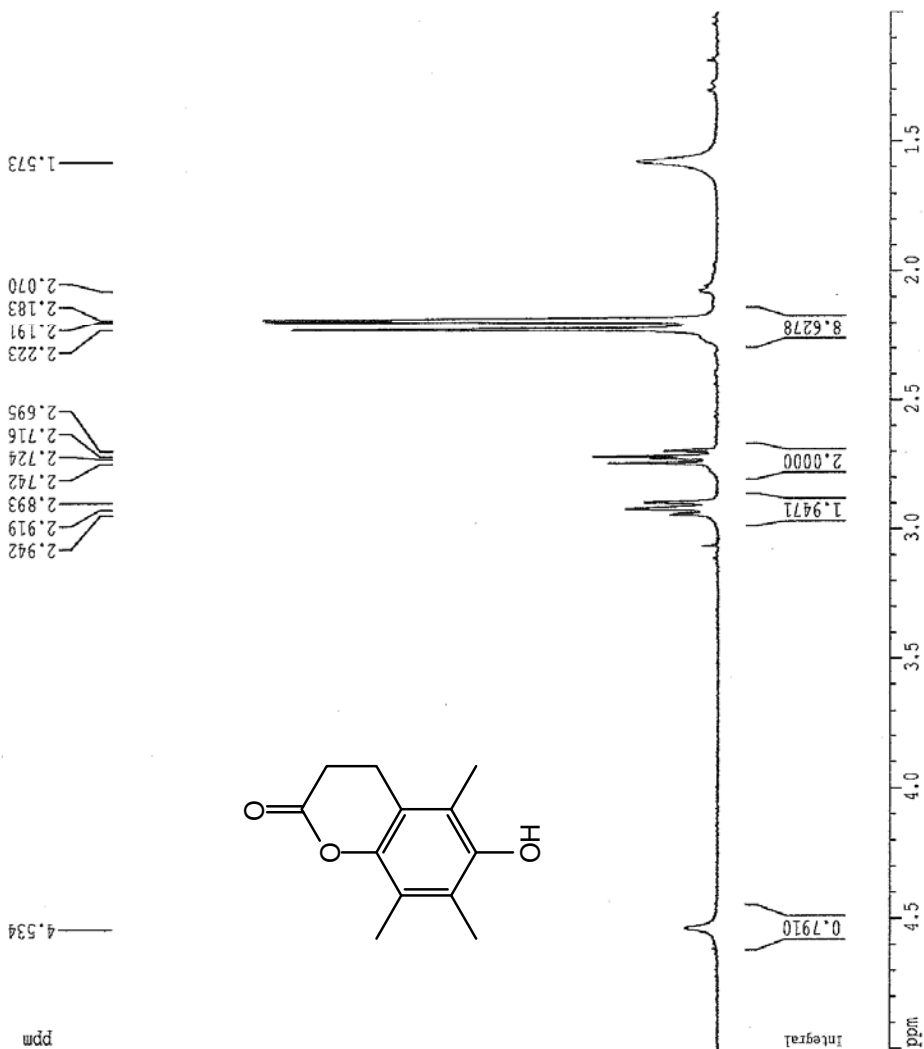

<sup>13</sup>C NMR Spectral Data for 3-HQ1

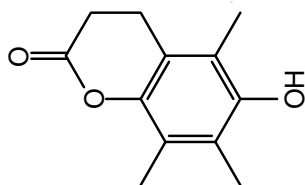

Current Data Parameters  
 NAME Q1C-lactone  
 EXNO 2  
 PROCNO 1

F2 - Acquisition Parameters  
 Date 20061218  
 Time 18.21  
 INSTRUM spect  
 PROCNO 5 mm Multi  
 PULPROG zgpg30  
 TD 16384  
 SOLVENT CDCl3  
 NS 14000  
 DS 2  
 SWH 22727.273 Hz  
 FIDRES 1.387163 Hz  
 AQ 0.3604980 sec  
 RG 32768  
 DW 22.000 usec  
 DE 31.43 usec  
 TE 300.0 K  
 D12 6.00002000 sec  
 D16 23.00 dB  
 D1 2.00000000 sec  
 CPLEPRG waltz16  
 P31 86.00 usec  
 D11 0.03000000 sec  
 D15 23.00 dB  
 P1 5.80 usec  
 SFO1 75.4751777 MHz  
 NUC13C

F2 - Processing parameters  
 SI 16384  
 SF 75.4677347 MHz  
 WDW EM  
 SSB 0  
 LB 3.00 Hz  
 GB 0  
 PC 1.40

1D NMR plot parameters  
 CX 18.00 cm  
 F1F 200.000 ppm  
 F1 15093.55 Hz  
 F2F 0.000 ppm  
 F2 0.00 Hz  
 FPCN 11.1111 ppm/cm  
 HZCN 838.53933 Hz/cm

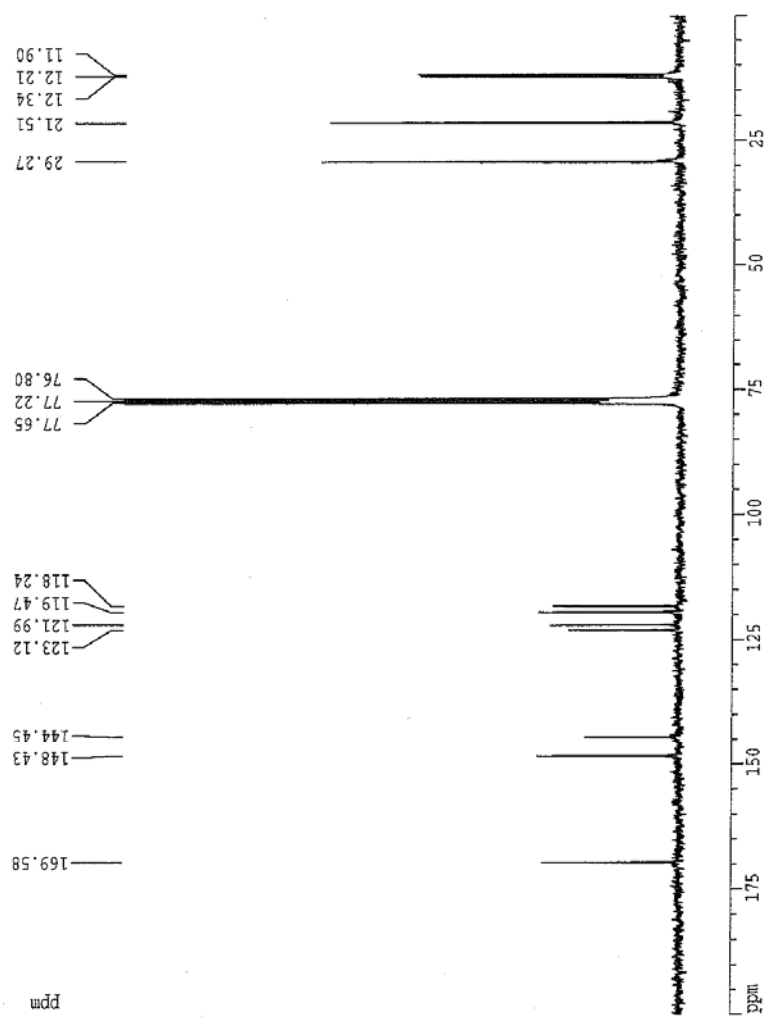

# HR-ESI-ToF-MS Data for 4-Q1

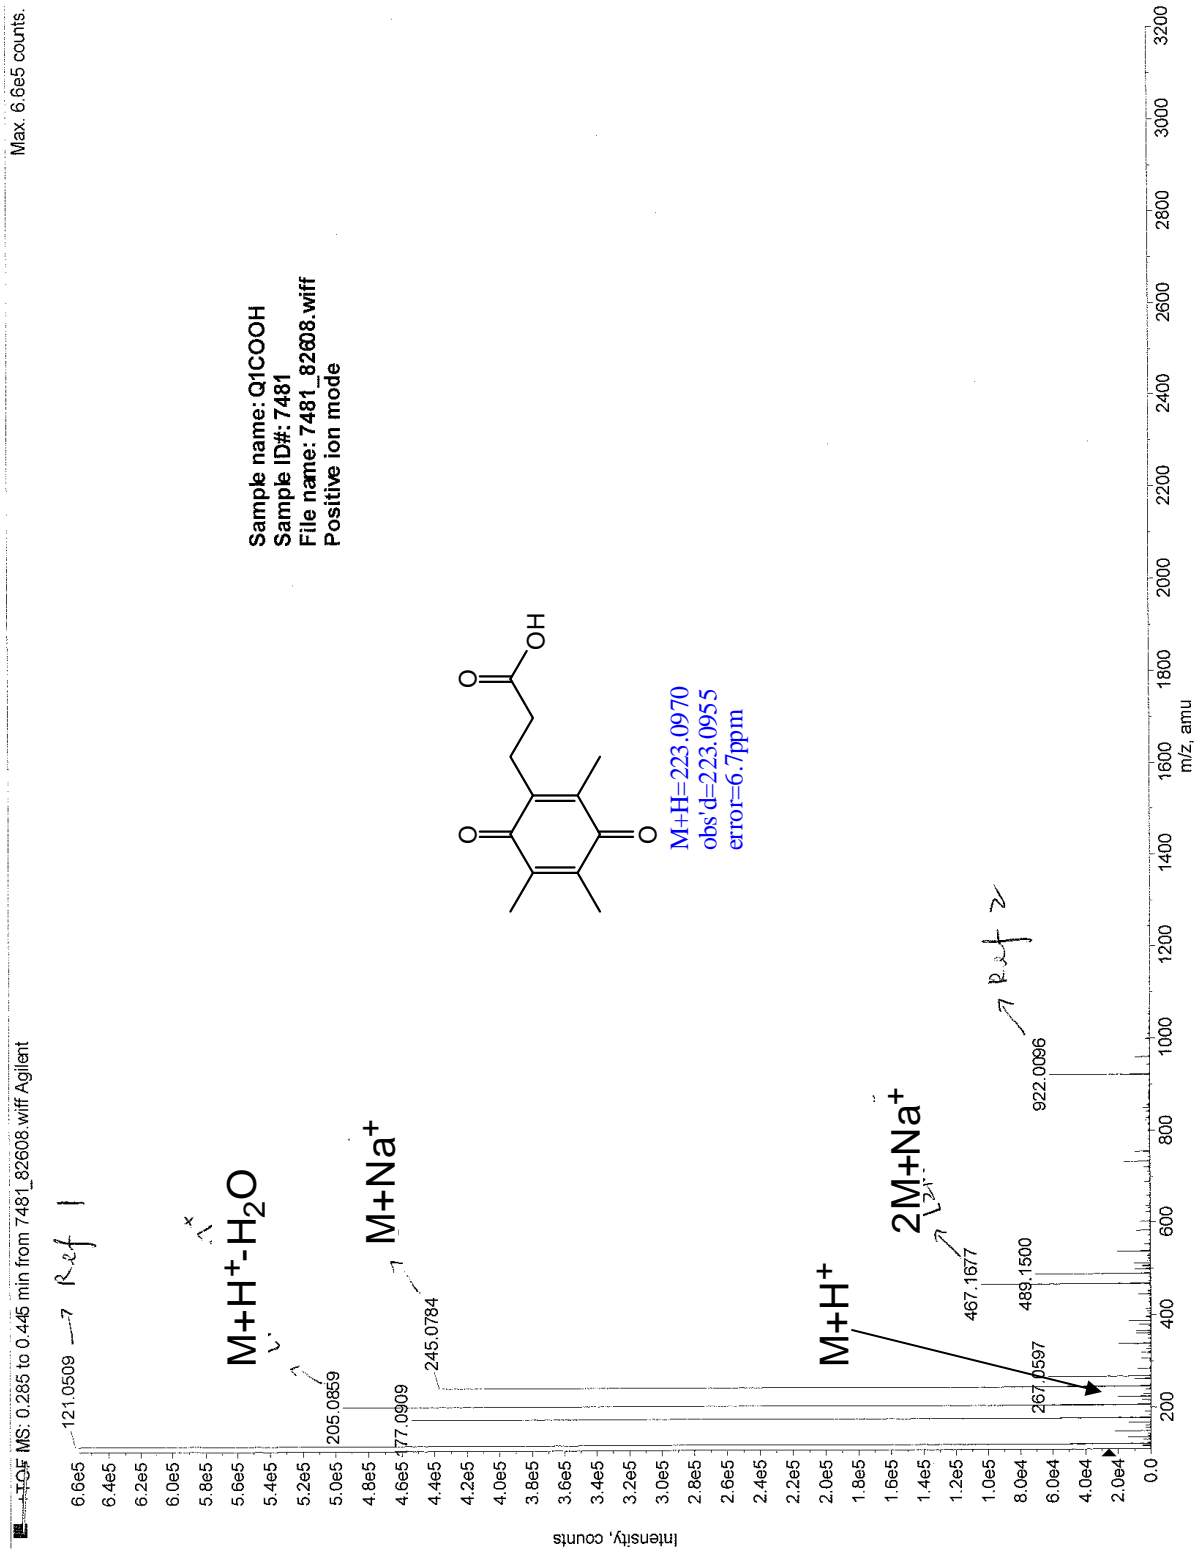

# <sup>1</sup>H NMR Spectral Data for 4-Q1

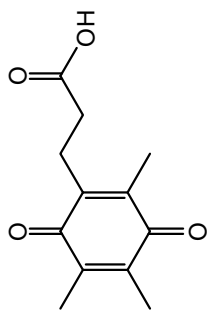

Current Data Parameters  
 NAME Q1C-COOH  
 EXNO 1  
 PROCNO 1

F2 - Acquisition Parameters  
 Date 20070313  
 Time 13.23  
 INSTRUM spect  
 PROBD 5 mm Nulti  
 PULPROG zg30  
 TD 27026  
 SOLVENT CDCl3  
 NS 16  
 DS 2  
 SWH 4504.504 Hz  
 FIDRES 0.166673 Hz  
 AQ 2.9999361 sec  
 RG 2048  
 DW 111.000 usec  
 DE 158.57 usec  
 TE 305.0 K  
 D1 2.0000000 sec  
 P1 6.95 usec  
 SFO1 300.1312005 MHz  
 NUCLEUS 1H

F2 - Processing parameters  
 SI 65536  
 SF 300.1300048 MHz  
 EQN EM  
 SSB 0  
 LB 0.20 Hz  
 GB 0  
 PC 1.00

1D NMR plot parameters  
 CX 18.00 cm  
 P1P 3.250 ppm  
 F1 975.42 Hz  
 F2P 1.500 ppm  
 F2 459.20 Hz  
 PPM2CM 0.09722 ppm/cm  
 HZCM 29.17831 Hz/cm

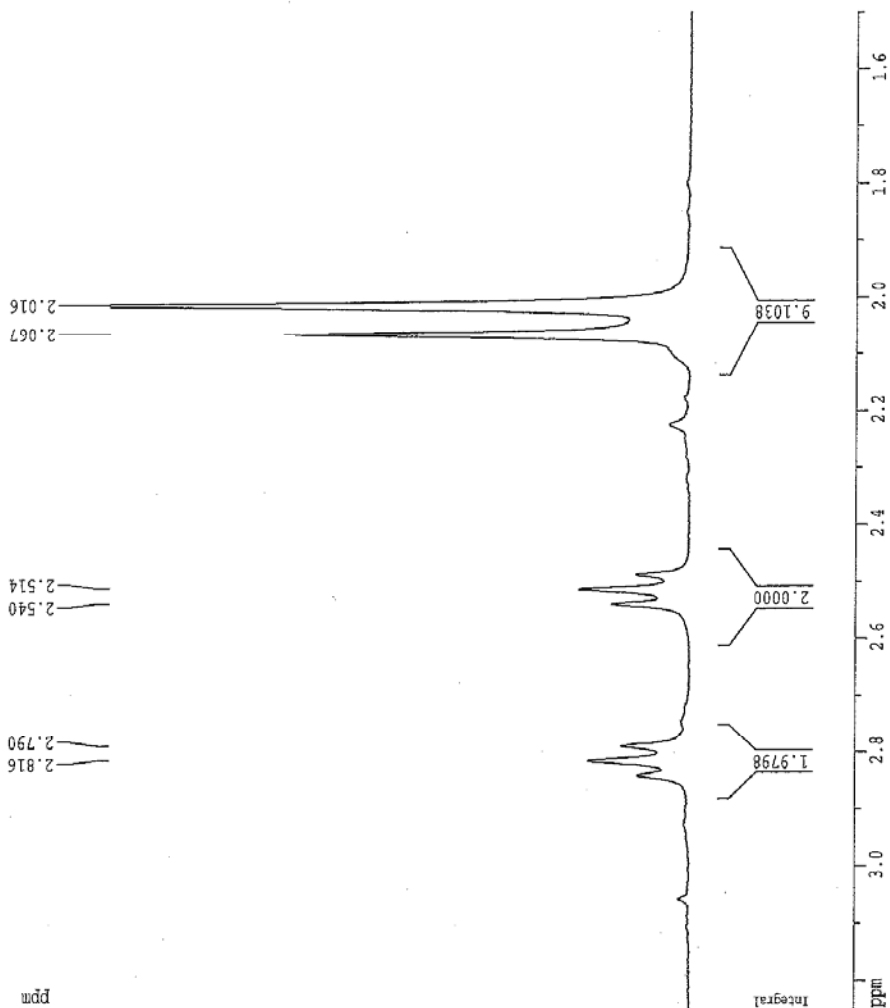

<sup>13</sup>C NMR Spectral Data for 4-Q1

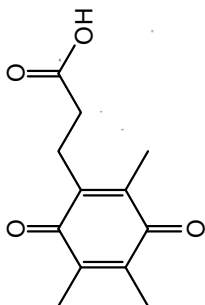

Current Data Parameters  
 NAME Q1C-COOH  
 EXNO 2  
 PROCNO 1

F2 - Acquisition Parameters  
 Date 20070313  
 Time 14.18  
 INSTRUM spect  
 PROBRD 5 mm Multi  
 PULPROG zgpg30  
 TD 16384  
 FIDRES 0.35604990 sec  
 AQ 32768  
 RG 22.000 usec  
 DE 31.43 usec  
 TE 300.0 K  
 D12 0.0002000 sec  
 DL6 23.00 dB  
 D1 2.0000000 sec  
 CPDPRG waltz16  
 P31 86.00 usec  
 D11 0.03000000 sec  
 DL5 23.00 dB  
 P1 9.80 usec  
 SF01 75.475177 MHz  
 NUCLEUS <sup>13</sup>C

F2 - Processing parameters  
 SI 16384  
 SF 75.4677375 MHz  
 MVM EX  
 SSB 0  
 LB 1.00 Hz  
 GB 0  
 PC 1.40

1D NMR Plot parameters  
 CX 18.00 cm  
 F1P 200.000 ppm  
 F1 15093.55 Hz  
 F2P 0.000 ppm  
 F2 0.00 Hz  
 PPMCM 11.1111 ppm/cm  
 HZCM 838.53033 Hz/cm

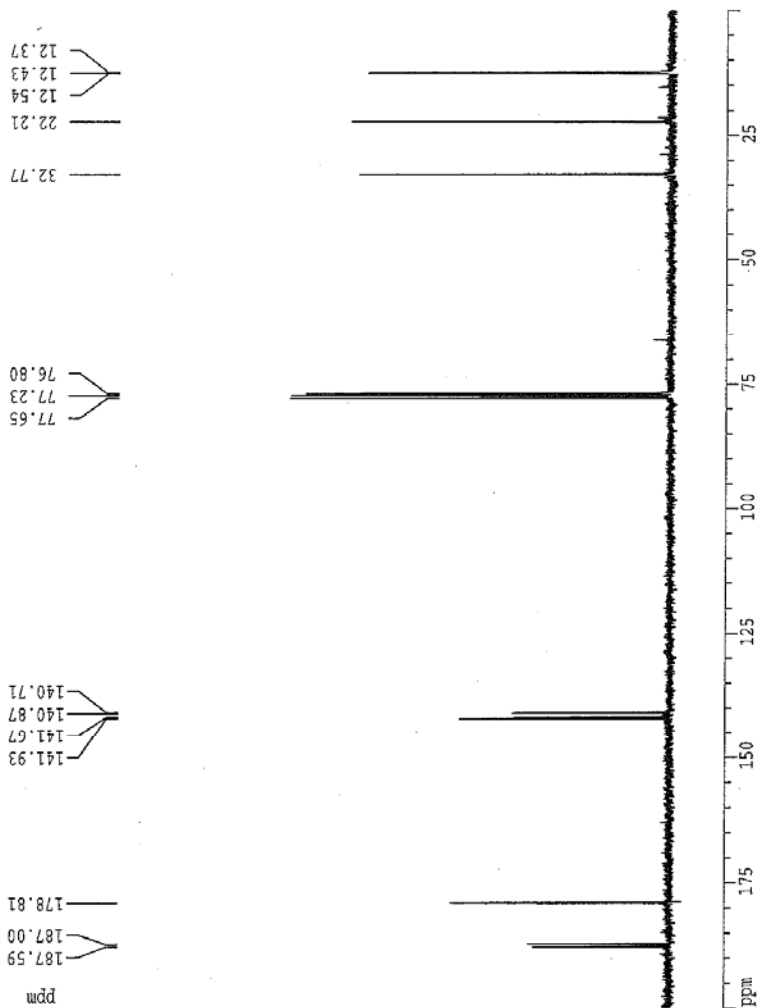



HR-ESI-ToF-MS Data for 5-Q1

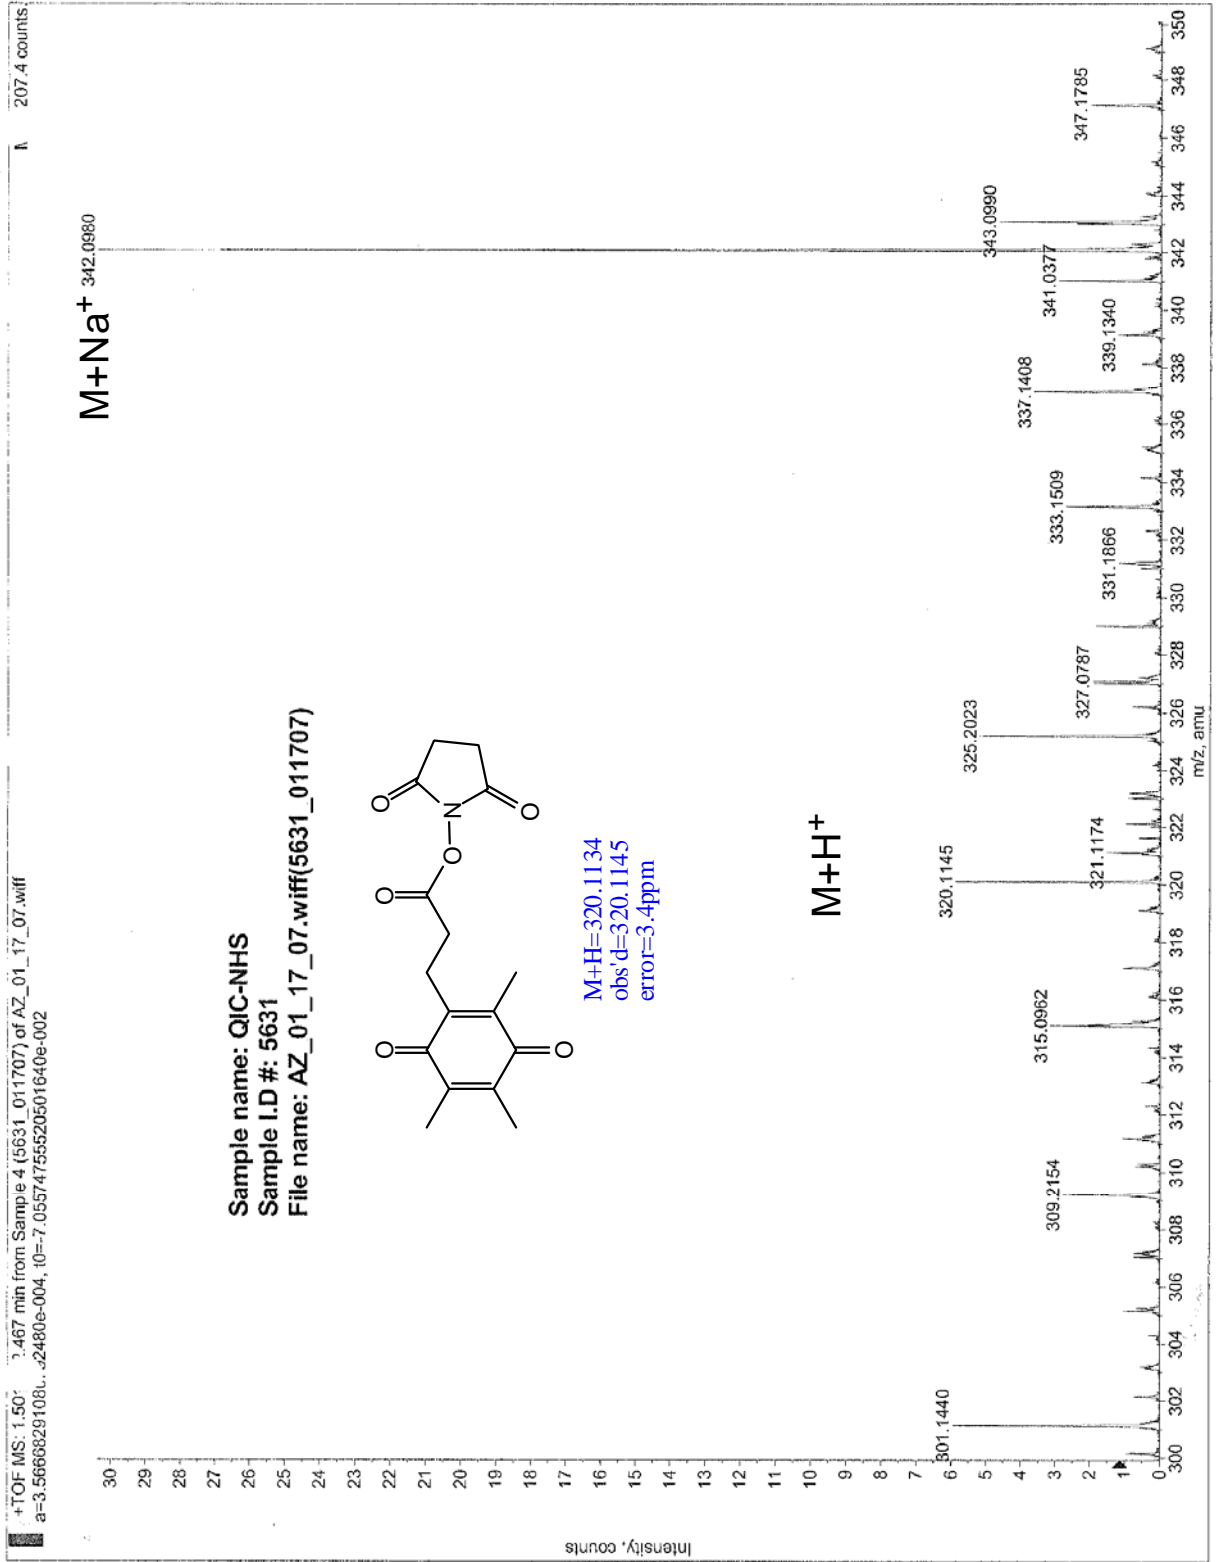

<sup>1</sup>H NMR Spectral Data for 5-Q1

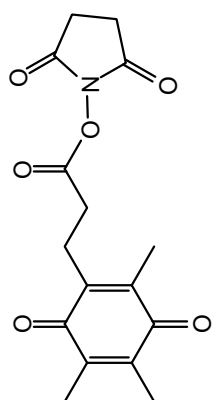

Current Data Parameters  
 NAME Q1C-NHS  
 EXPNO 1  
 PROCNO 1

F2 - Acquisition Parameters  
 Date 2607011  
 Time 13.38  
 INSTRUM spect  
 PROBRD 5 mm Mult1  
 PULPROG zgpg30  
 TD 27026  
 SOLVENT CDCl3  
 NS 16  
 DS 2  
 SMH 4504.504 Hz  
 FIDRES 0.166673 Hz  
 AQ 2.9989361 sec  
 RG 2048  
 DN 111.000 usec  
 DE 158.57 usec  
 TE 305.0 K  
 D1 2.0000000 sec  
 P1 6.95 usec  
 SFO1 300.1312005 MHz  
 NUCLEUS 1H

F2 - Processing parameters  
 SI 65536  
 SF 300.1300041 MHz  
 MDW 0  
 SSB 0  
 LB 0.20 Hz  
 GB 0  
 PC 1.00

1D NMR plot parameters  
 CX 18.00 cm.  
 P1P 3.500 ppm  
 F1 1050.46 Hz  
 F2P 1.000 ppm  
 F2 300.13 Hz  
 PPMCM 0.13869 ppm/cm  
 HZCM 41.66472 Hz/cm

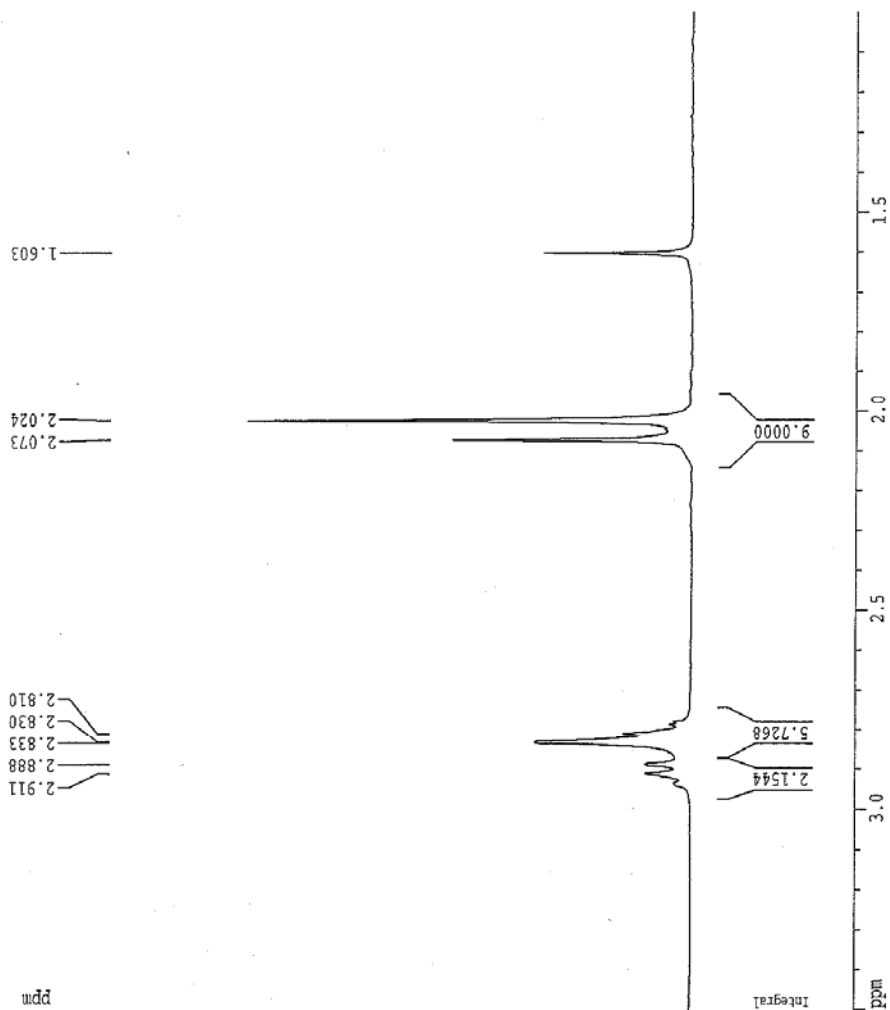

<sup>13</sup>C NMR Spectral Data for 5-Q1

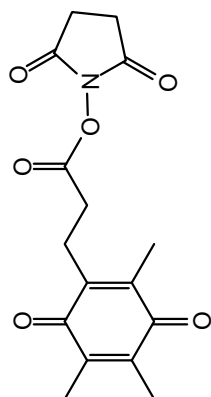

Current Data Parameters  
 NAME Q1C-NHS  
 EXNO 2  
 PROCNO 1

F2 - Acquisition Parameters  
 Date 20070313  
 Time 15.10  
 INSTRUM spect  
 PROBRD 5 mm Multi  
 PULPROG zgpg30  
 TD 65536  
 ID 16384  
 SOLVENT CDCl3  
 NS 424  
 DS 2  
 SWH 22727.273 Hz  
 FIDRES 1.387163 Hz  
 AQ 0.3664980 sec  
 RG 32768  
 DW 22.000 usec  
 DE 31.43 usec  
 TE 300.0 K  
 D12 0.0002000 sec  
 DLS 23.00 dB  
 DI 2.0000000 sec  
 CPDPRG waltz16  
 P11 86.00 usec  
 D11 0.0300000 sec  
 DMS 23.00 dB  
 P1 9.80 usec  
 SFC1 75.4751273 MHz  
 NUCLEUS <sup>13</sup>C

F2 - Processing parameters  
 SI 16384  
 SF 75.4577389 MHz  
 WDM EM  
 SSB 0  
 LB 3.00 Hz  
 GB 0  
 PC 1.40

ID NMR Plot Parameters  
 CK 18.00 cm  
 FIP 200.000 ppm  
 F1 15093.55 Hz  
 F2P 0.000 ppm  
 F2 0.00 Hz  
 PPMCM 11.1111 ppm/cm  
 HZCM 838.53033 Hz/cm

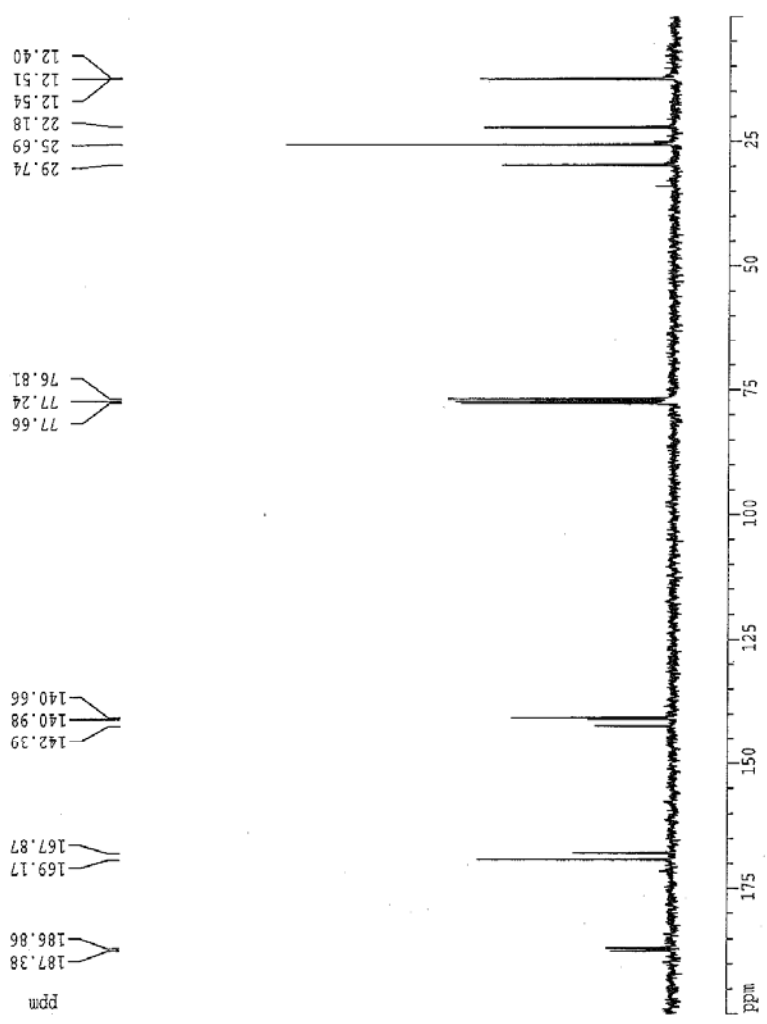

HR-ESI-ToF-MS Data for 2-Q1

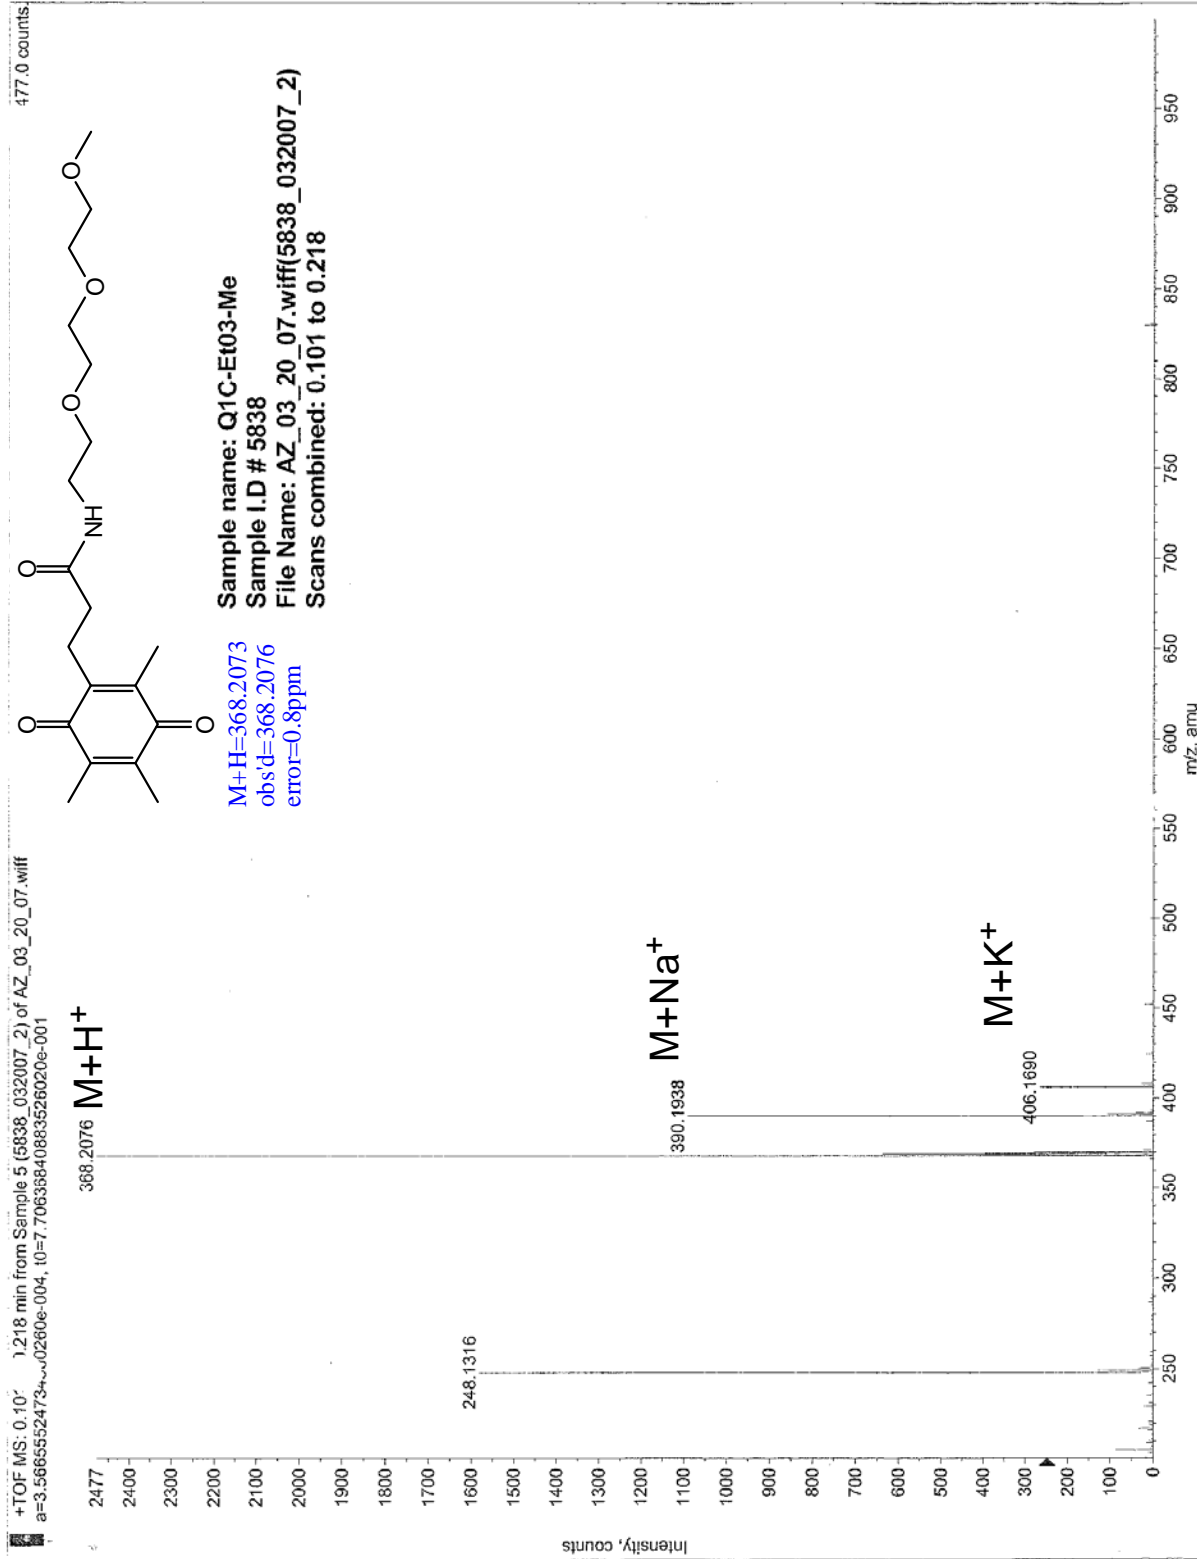

# <sup>1</sup>H NMR Spectral Data for 2-Q1

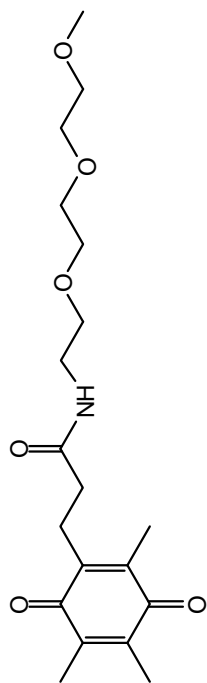

Current Data Parameters  
 NAME Q1C-2503-Me  
 EXNO 1  
 PROCN 1

F2 - Acquisition Parameters  
 Date 20061107  
 Time 18.32  
 INSTRUM spect  
 PROBEID 5 mm Multinu  
 PULPROG zg  
 TD 35970  
 SOLVENT CDCl3  
 NS 16  
 DS 2  
 SMH 5995.204 Hz  
 FIDRES 0.166672 Hz  
 AQ 2.9999490 sec  
 RG 256  
 DM 83.500 usec  
 DE 8.00 usec  
 TE 298.0 K  
 D1 2.00000000 Sec

\*\*\*\*\* CHANNEL f1 \*\*\*\*\*  
 NUC1 1H  
 P1 8.00 usec  
 PL1 1.00 dB  
 SFO1 400.1324508 MHz

F2 - Processing parameters  
 SI 65536  
 SF 400.1300080 MHz  
 MDW EM  
 SSB 0  
 LB 0.30 Hz  
 GB 0  
 PC 1.00

1D NMR plot parameters  
 CX 20.00 cm  
 FIP 8.000 ppm  
 F1 3201.04 Hz  
 FZP 0.000 ppm  
 F2 0.00 Hz  
 PPKM 0.40000 ppm/cm  
 HZCN 160.05200 Hz/cm

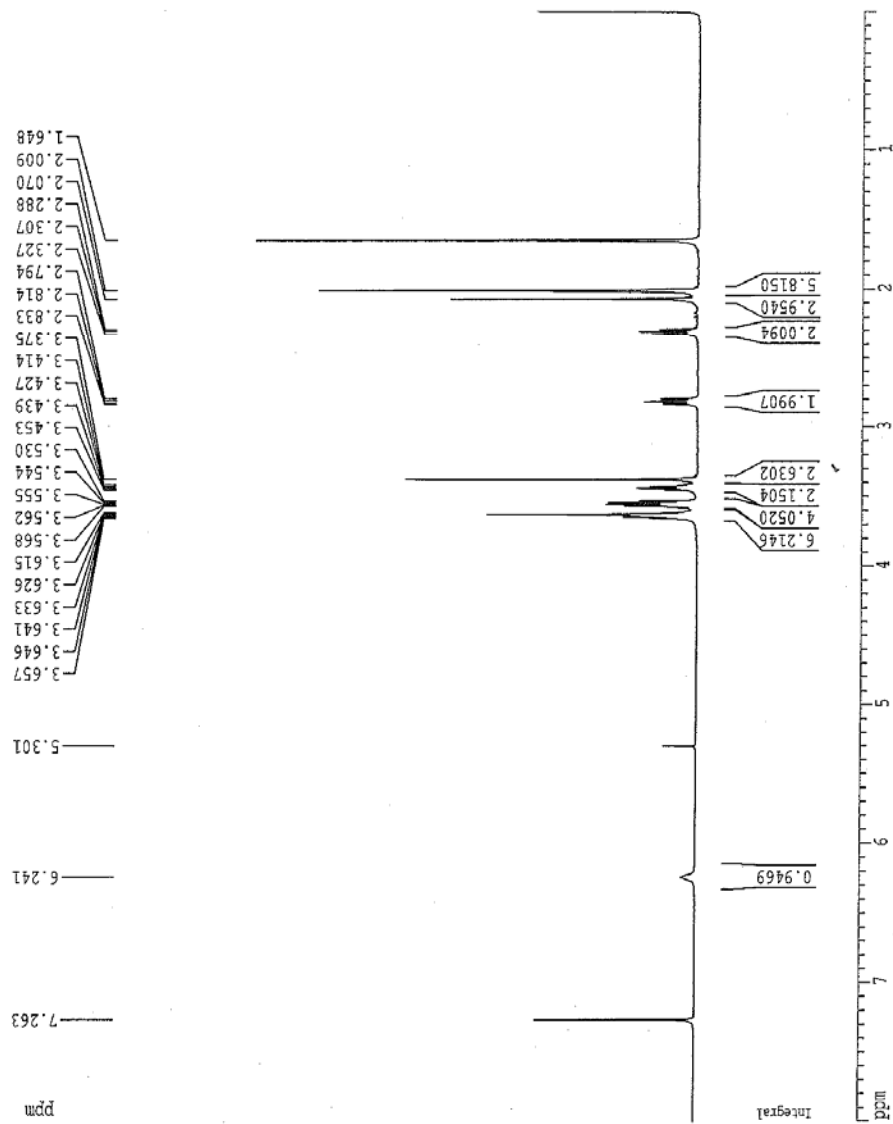

<sup>13</sup>C NMR Spectral Data for 2-Q1

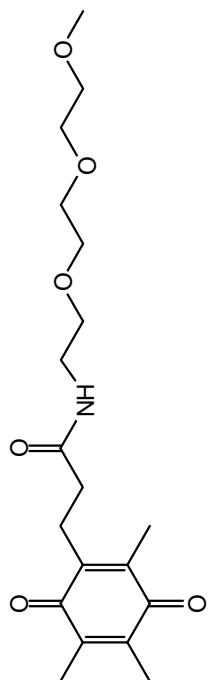

Current Data Parameters  
 NAME Q1C-8C03-M6  
 EXPNO 2  
 PROCNO 1

F2 - Acquisition Parameters  
 Date 20070108  
 Time 16.12  
 INSTRUM spect  
 PROBD 5 mm Waltz  
 PULPROG zgpg30  
 TD 16384  
 SOLVENT CFC13  
 NS 4146  
 DS 2  
 SFO1 22727.273 Hz  
 SFE 1.387163 Hz  
 FIDRES 0.3604980 sec  
 AQ 32768  
 DM 22.000 usec  
 DE 31.43 usec  
 TE 300.0 K  
 D12 0.0002000 sec  
 DL6 23.00 dB  
 D1 2.0000000 sec  
 CPDPRG waltz16  
 P31 86.00 usec  
 D11 0.03000000 sec  
 DL5 23.00 dB  
 P1 9.80 usec  
 SFO1 75.4751777 MHz  
 NUCLEUS 13C

F2 - Processing Parameters  
 SI 16384  
 SF 75.4677389 MHz  
 NDM 0  
 SSB 0  
 LB 3.00 Hz  
 GB 0  
 PC 1.40

1D NMR plot parameters  
 CX 18.00 cm  
 FIP 200.000 ppm  
 F1 15093.55 Hz  
 P2P 0.000 ppm  
 F2 0.00 Hz  
 PPKCM 11.1111 ppm/cm  
 HZCM 838.53033 Hz/cm

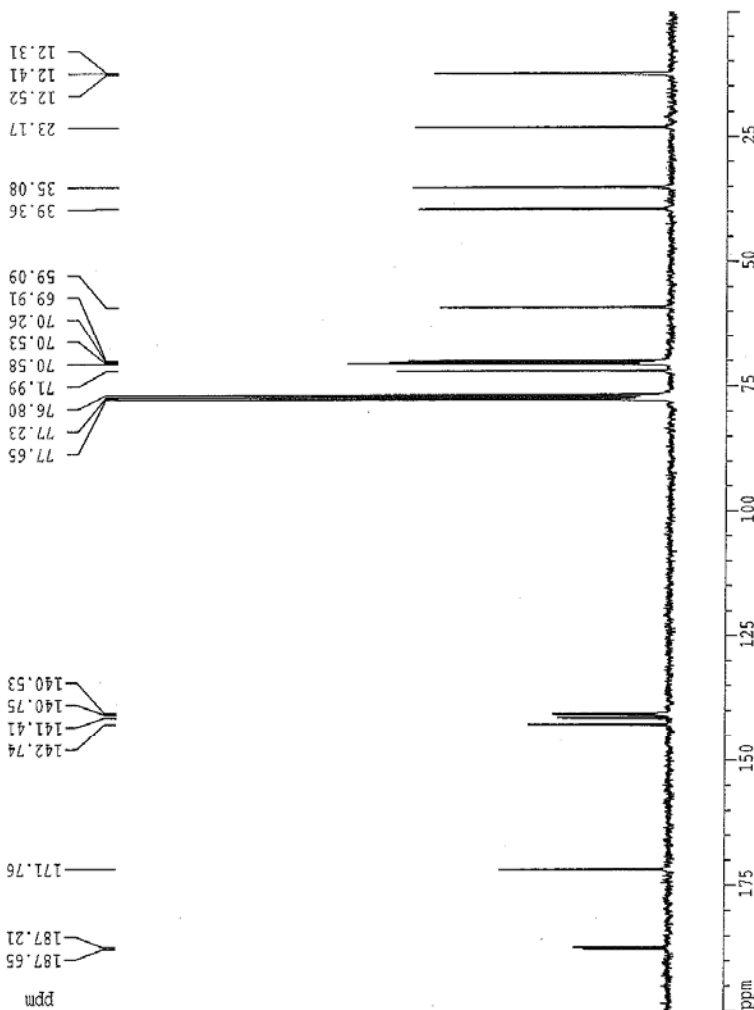

HR-ESI-ToF-MS Data for 1-Q1

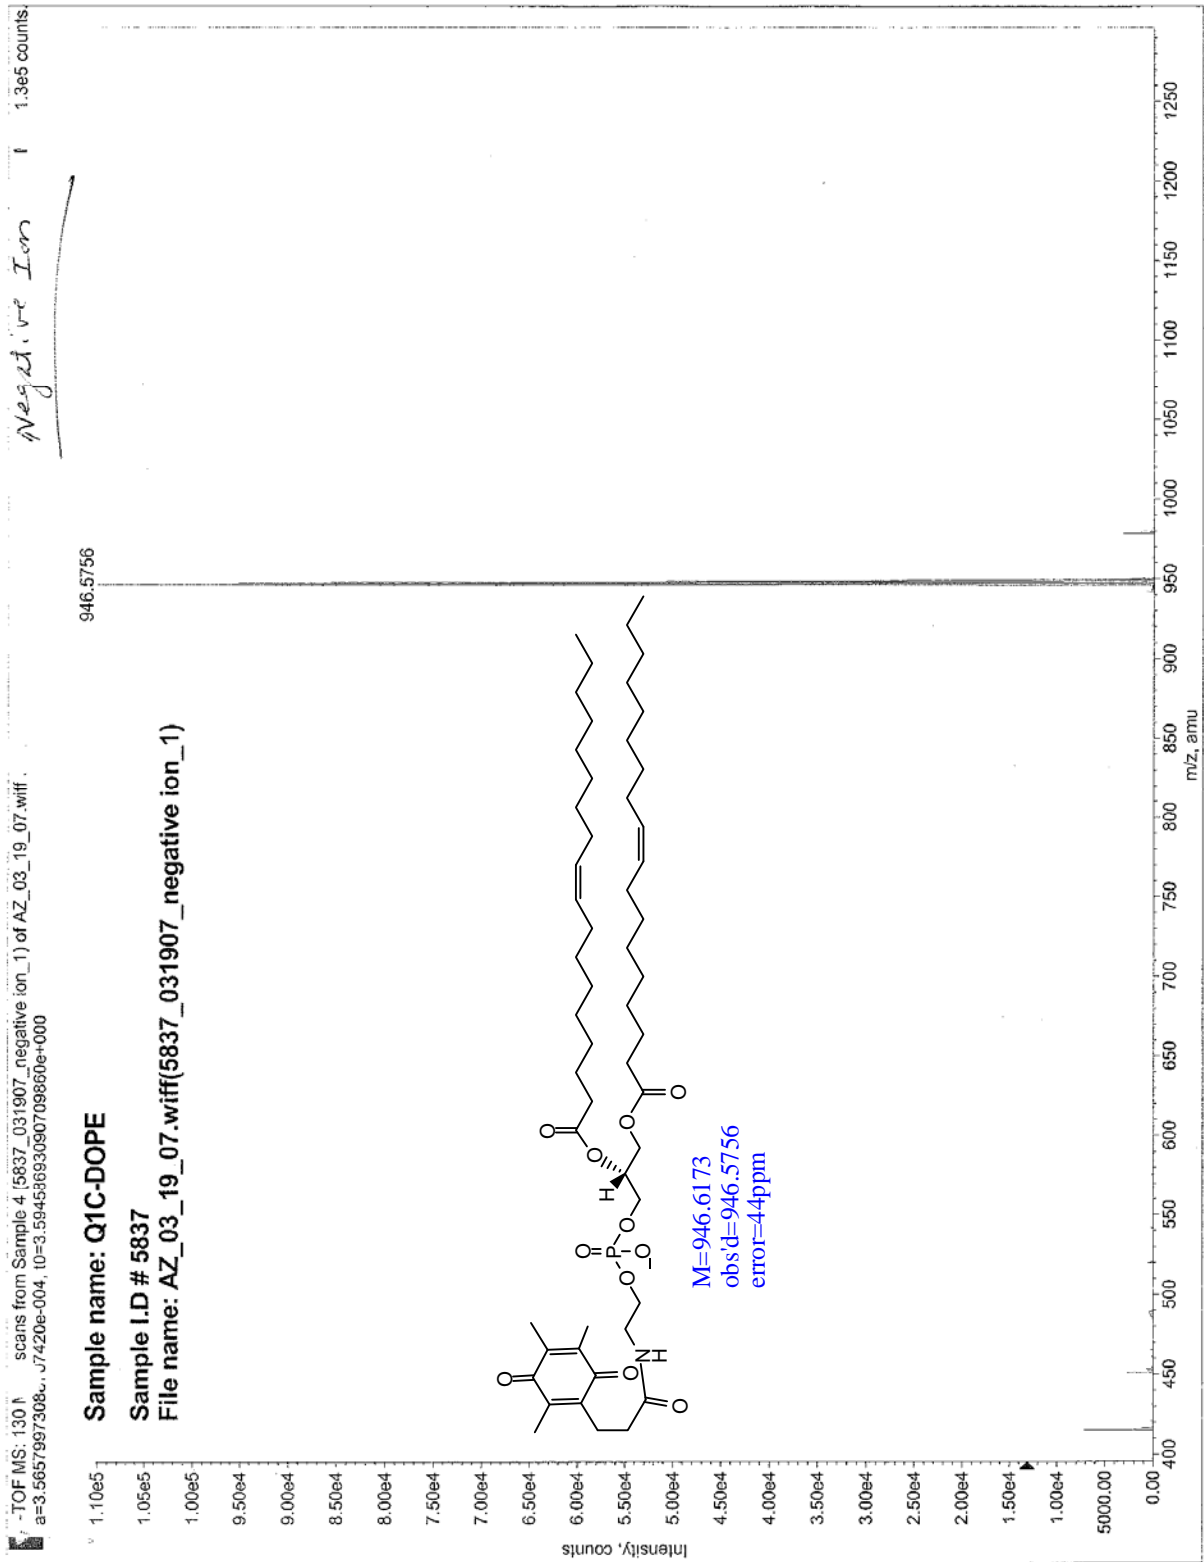

# <sup>1</sup>H NMR Spectral Data for 1-Q1

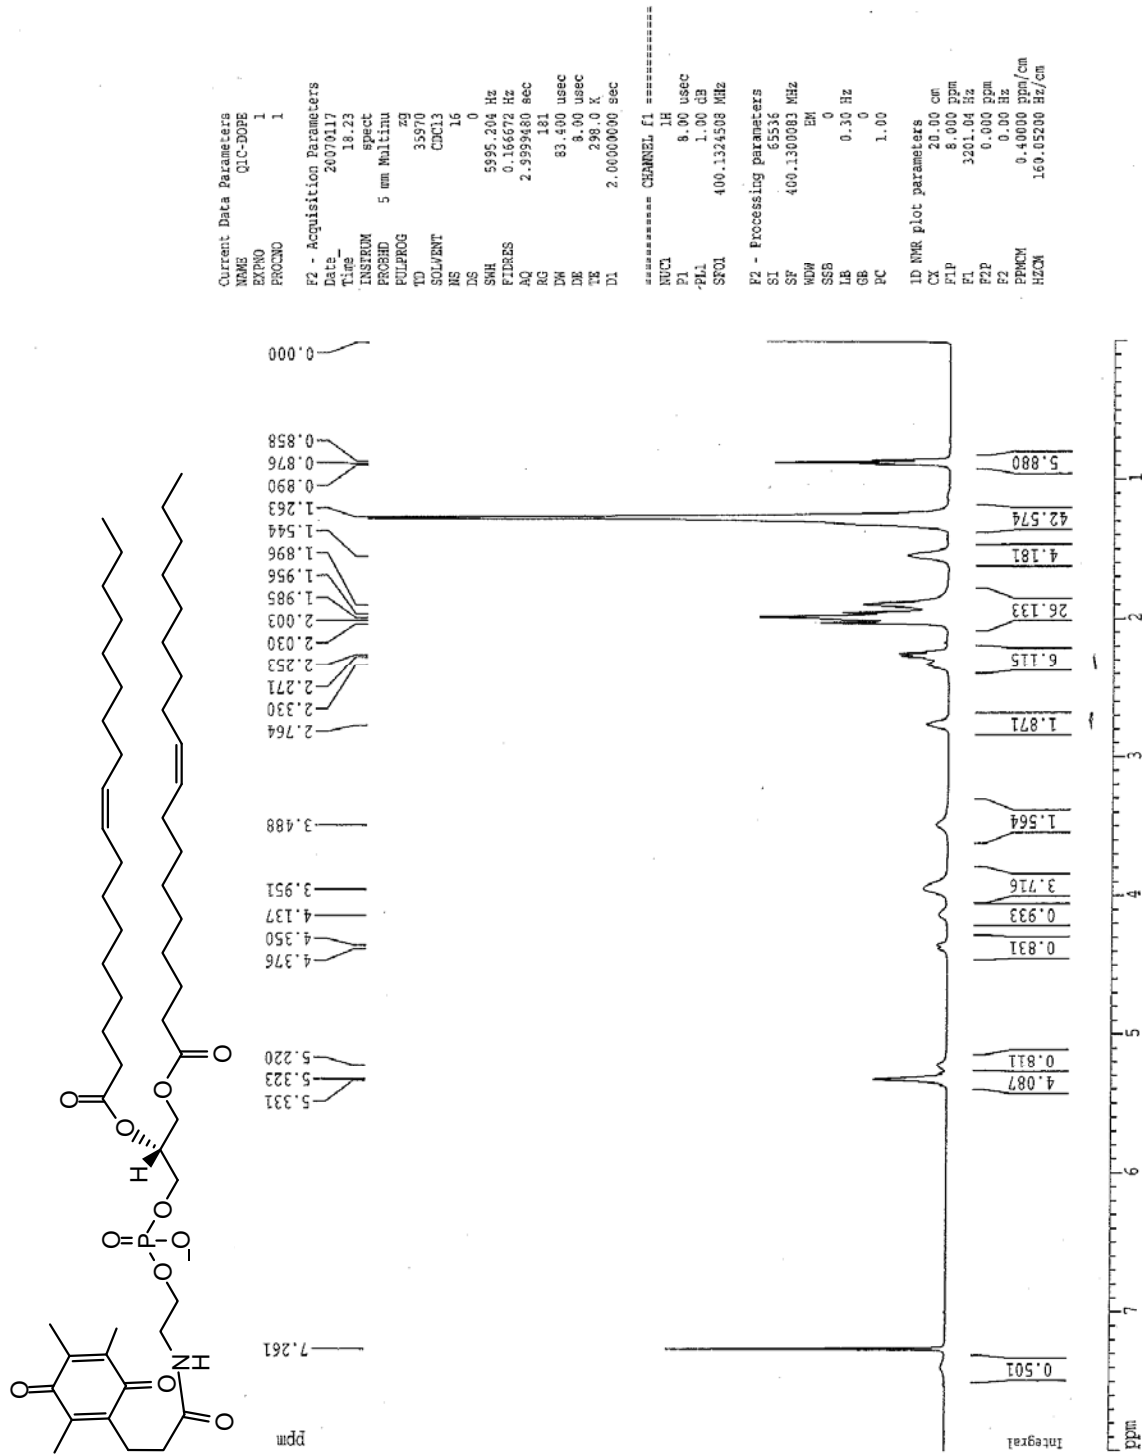



<sup>13</sup>C NMR Spectral Data for 1-Q1

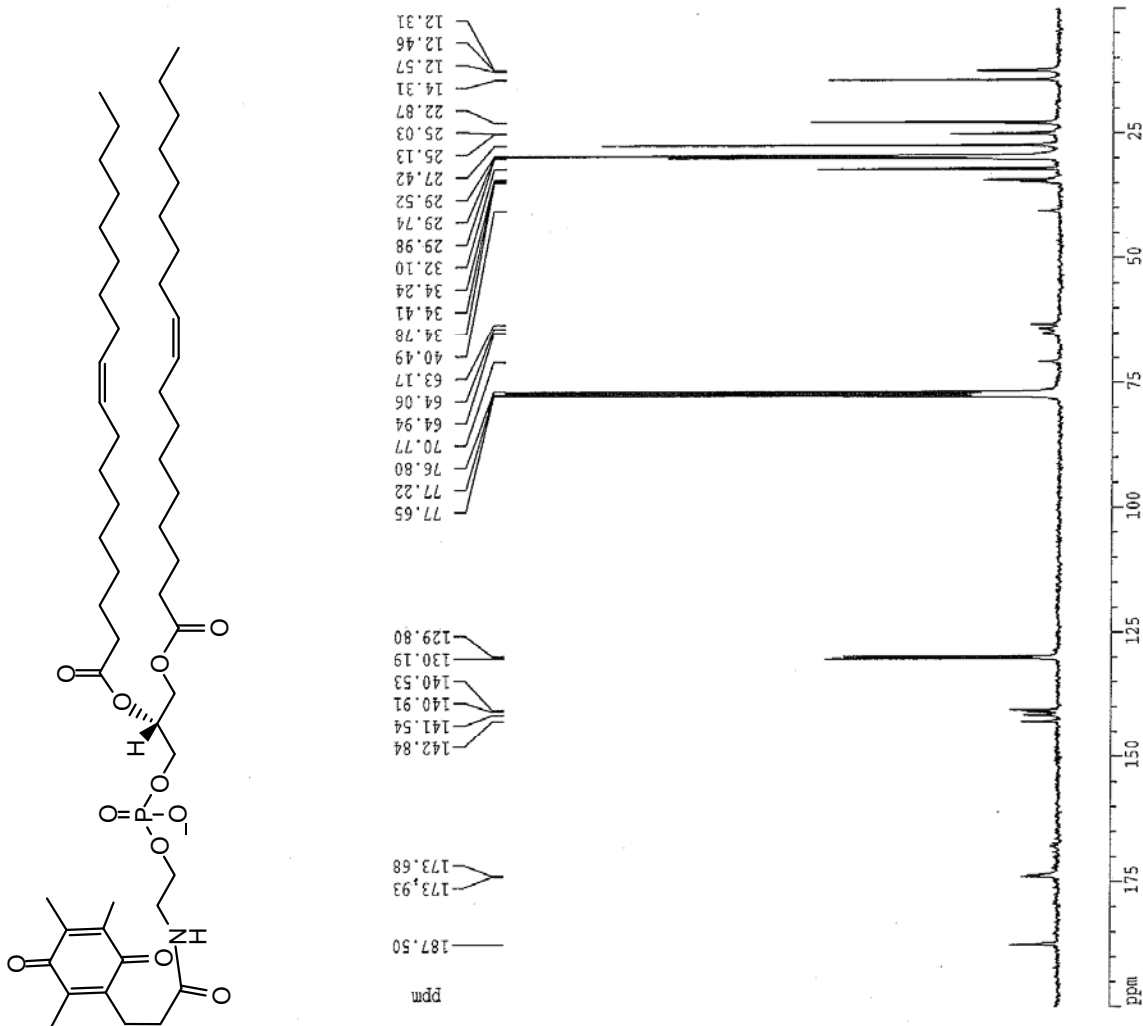

Current Data Parameters  
 NAME Q1C-DOPE  
 EXNO 2  
 PROCNO 1

F2 - Acquisition Parameters  
 Date 20070313  
 Time 18.25  
 INSTRUM spect  
 PROCNO 5 mm Multi  
 PULPROG zgpg30  
 TD 16384  
 SOLVENT Aceton  
 NS 20000  
 DS 2  
 SWE 22727.273 Hz  
 FIDRES 1.387163 Hz  
 AQ 0.3604980 sec  
 RG 32768  
 DW 22.000 usec  
 DE 31.43 usec  
 TR 300.0 X  
 D12 0.00002000 sec  
 DL4 23.00 dB  
 D1 2.00000000 sec  
 CPEPRG maltz16  
 F31 86.00 usec  
 DL1 0.03000000 sec  
 DL5 23.00 dB  
 F1 9.80 usec  
 SF01 75.4751777 MHz  
 NUCLEUS 13C

F2 - Processing parameters  
 SI 16384  
 SF 75.4677347 MHz  
 EM  
 SSB 0  
 LB 5.00 Hz  
 GB 0  
 PC 1.40

1D NMR plot parameters  
 CX 16.00 cm  
 FLP 200.000 ppm  
 F1 15093.55 Hz  
 F2P 0.000 ppm  
 F2 0.00 Hz  
 FREQM 11.1111 ppm/cm  
 HZCM 838.53033 Hz/cm

HR-ESI-ToF-MS Data for 3-HQ3

Max: 1.9e5 counts

TOF MS: 0.262 to 0.440 min from 7483\_1\_neg\_82608.wiff Agilent

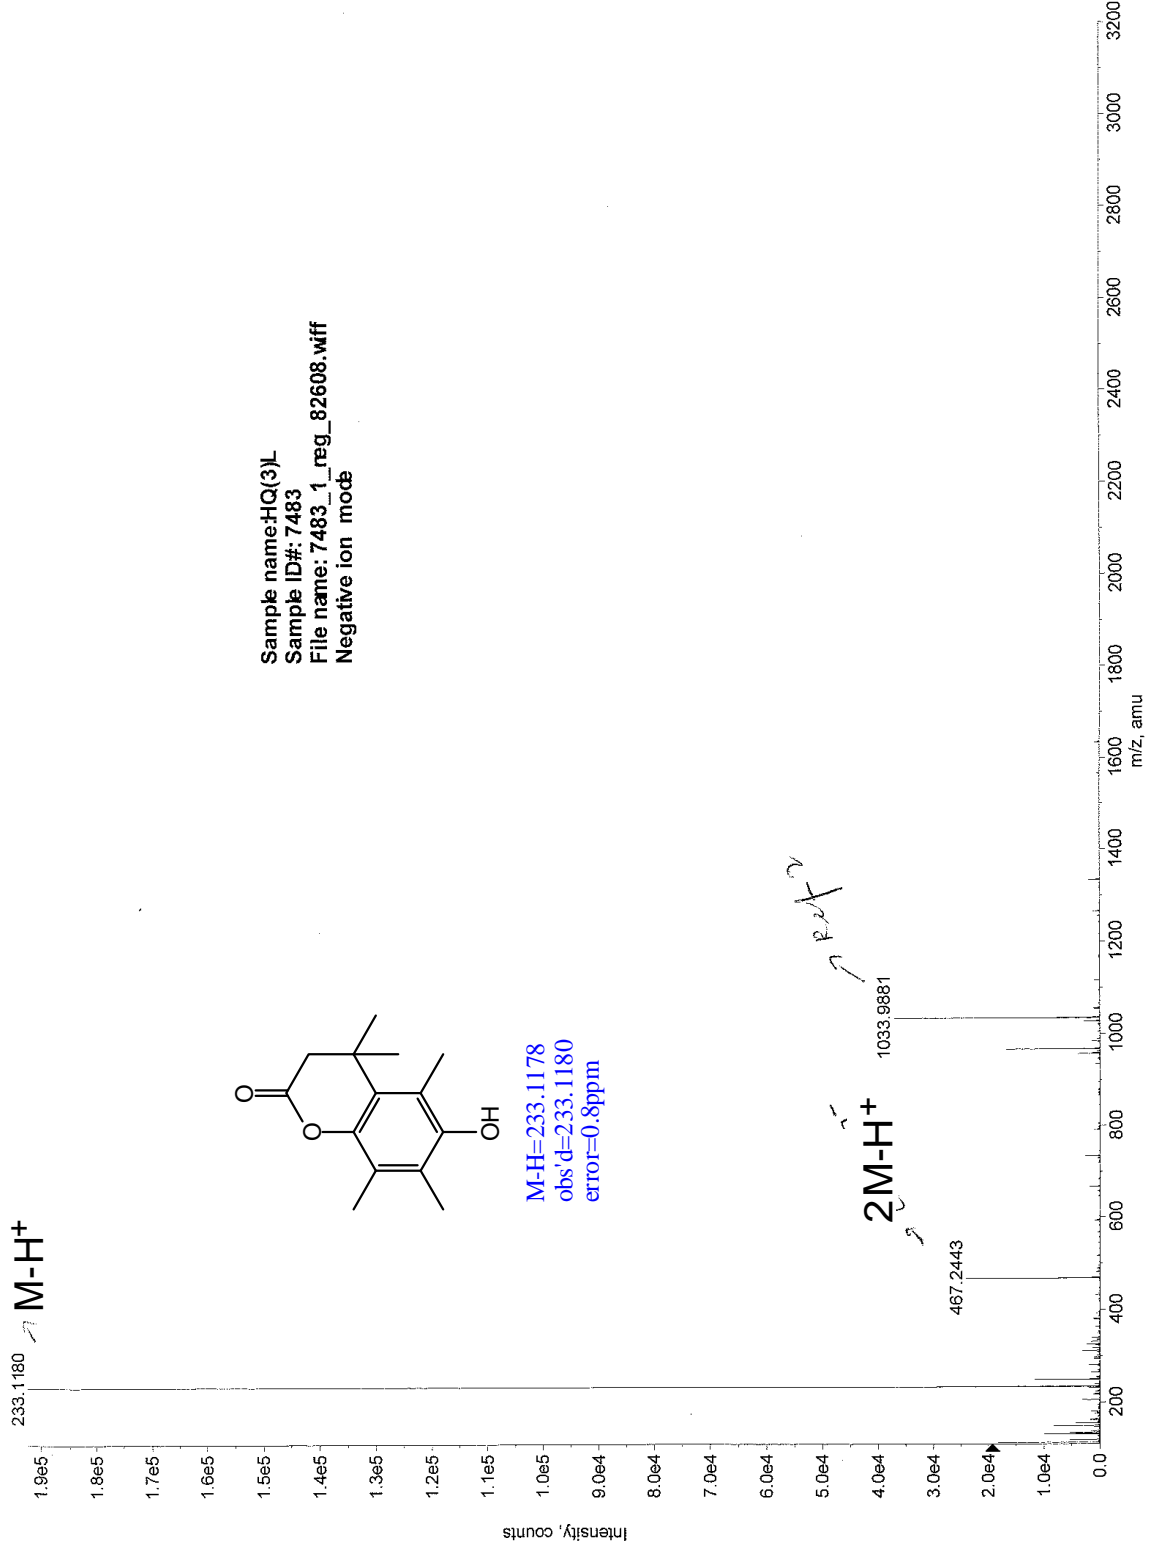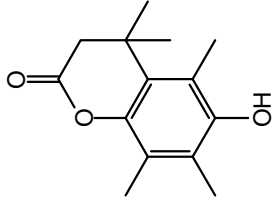

M-H=233.1178  
obs'd=233.1180  
error=0.8ppm

Sample name: HQ(3)L  
Sample ID#: 7483  
File name: 7483\_1\_neg\_82608.wiff  
Negative ion mode

# <sup>1</sup>H NMR Spectral Data for 3-HQ3

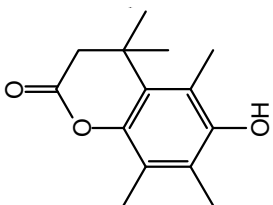

```

Current Data Parameters
NAME      Q3-lactone
EXPNO     1
PROCNO    1

F2 - Acquisition Parameters
Date_     20040908
Time      19.37
INSTRUM   spect
PROBHD    5 mm Multina
PULPROG   zg30
TD         35970
SOLVENT   D2O
NS         16
DS         0
SMH        5995.204 Hz
FIDRES     0.166672 Hz
AQ         2.9999480 sec
RG         362
DW         83.400 usec
DE         8.00 usec
TE         298.0 K
D1         2.0000000 sec

===== CHANNEL f1 =====
NUC1      1H
P1         8.00 usec
PL1        1.00 dB
SFO1      400.1324903 MHz

F2 - Processing parameters
SI         65536
SF         400.1300099 MHz
WDW        EM
SSB        0
LB         0.30 Hz
GB         0
PC         1.00

LD NMR plot parameters
CX         20.00 cm
FLP        8.000 ppm
F1         3201.04 Hz
F2P        0.000 ppm
F2         0.00 Hz
P0/M0/M1  0.40000 ppm/cm
HEC4       160.05200 Hz/cm
    
```

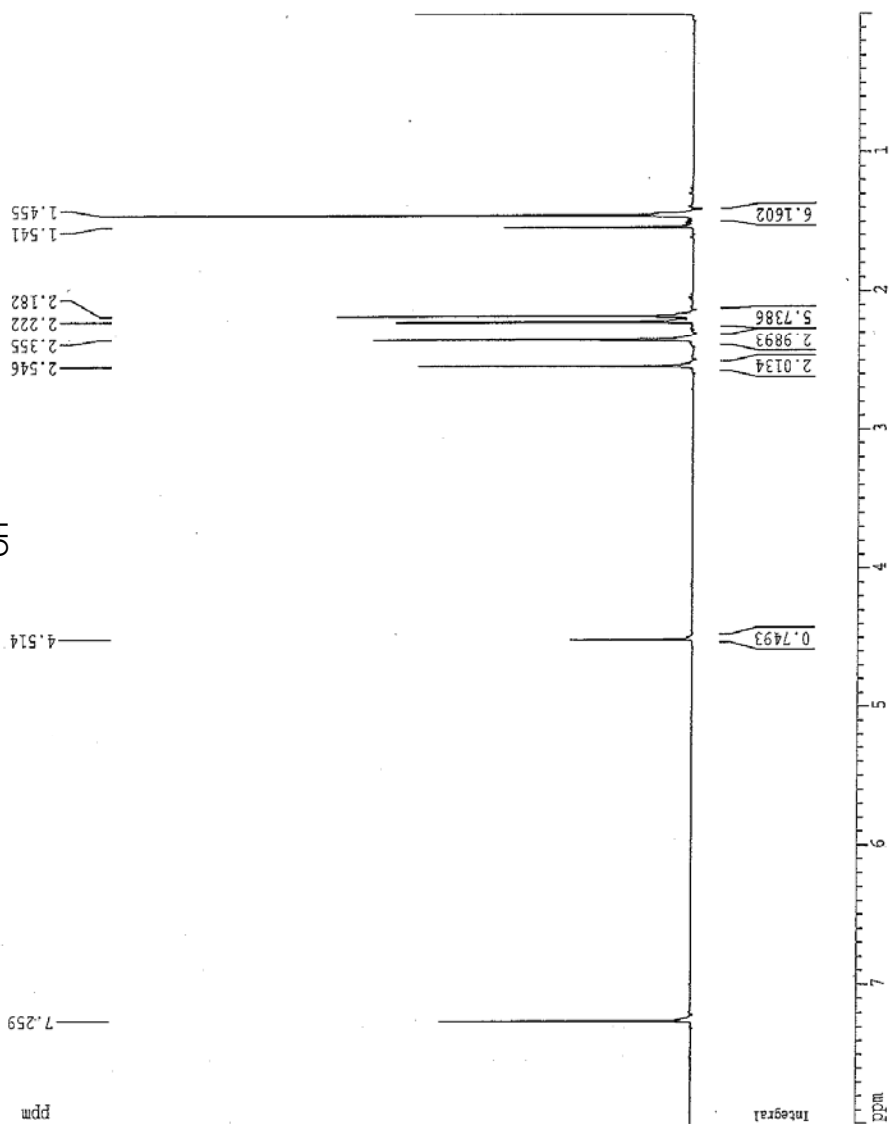

<sup>13</sup>C NMR Spectral Data for 3-HQ3

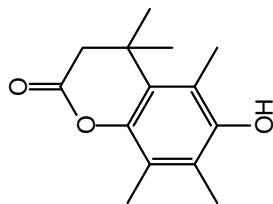

product from a 10 g scale starting material (triMe Quinone)

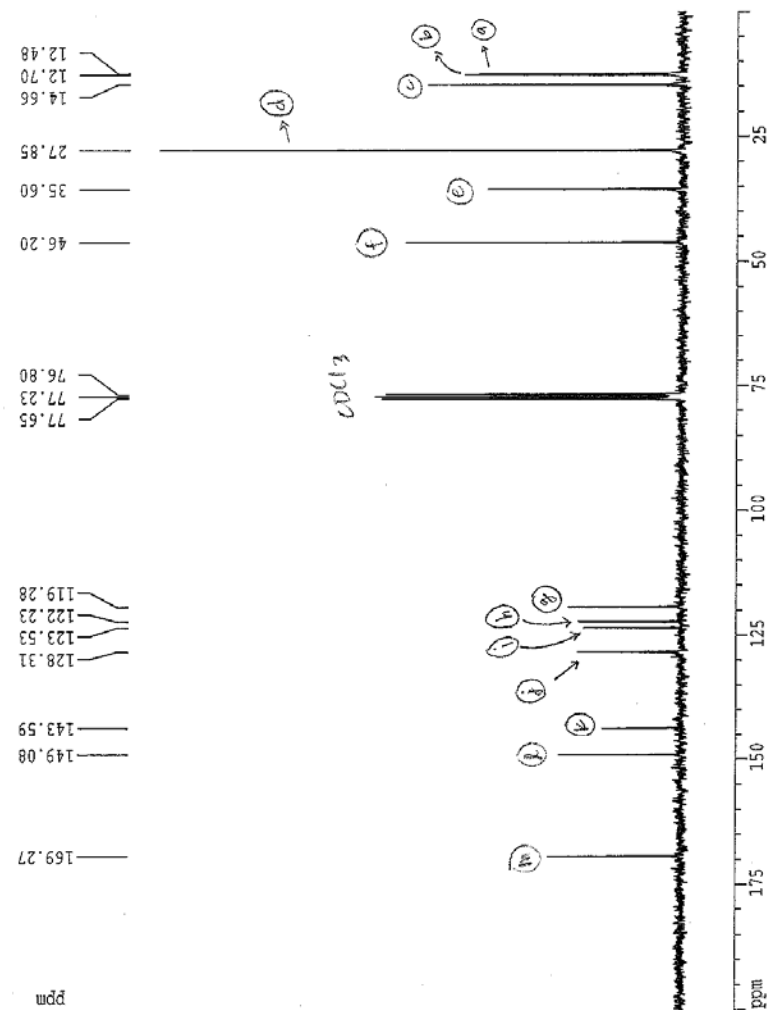

Current Data Parameters  
 NAME G3-lactone  
 EXPNO 3  
 PROCNO 1

F2 - Acquisition Parameters  
 Date\_ 20040928  
 Time 11.15  
 INSTRUM spect  
 PROBRD 5 mm Multinu  
 PULPROG zgpg30  
 TD 65536  
 FIDRES 16384  
 SOLVENT CDCl3  
 NS 742  
 DS 2  
 SWH 22727.273 Hz  
 FIDRES 1.387163 Hz  
 AQ 0.3604980 sec  
 RG 32768  
 DW 22.000 usec  
 DE 31.43 usec  
 TE 300.0 K  
 D12 0.000200 sec  
 DL6 23.00 dB  
 D1 2.00000000 sec  
 CDEPRG waltz16  
 P11 85.00 usec  
 D11 0.0300000 sec  
 DL5 23.00 dB  
 P1 9.80 usec  
 SFO1 75.4751777 MHz  
 NUCLEUS 13C

F2 - Processing parameters  
 SI 16384  
 SF 75.4677389 MHz  
 NDW EM  
 SSB 0  
 LB 3.00 Hz  
 CB 0  
 PC 1.40

1D NMR plot parameters  
 CX 18.00 cm  
 F1P 200.000 ppm  
 F1 15083.55 Hz  
 F2P 0.000 ppm  
 F2 0.00 Hz  
 PPGW 11.1111 ppm/cm  
 HCN 838.53033 Hz/cm

HR-ESI-ToF-MS Data for 4-Q3

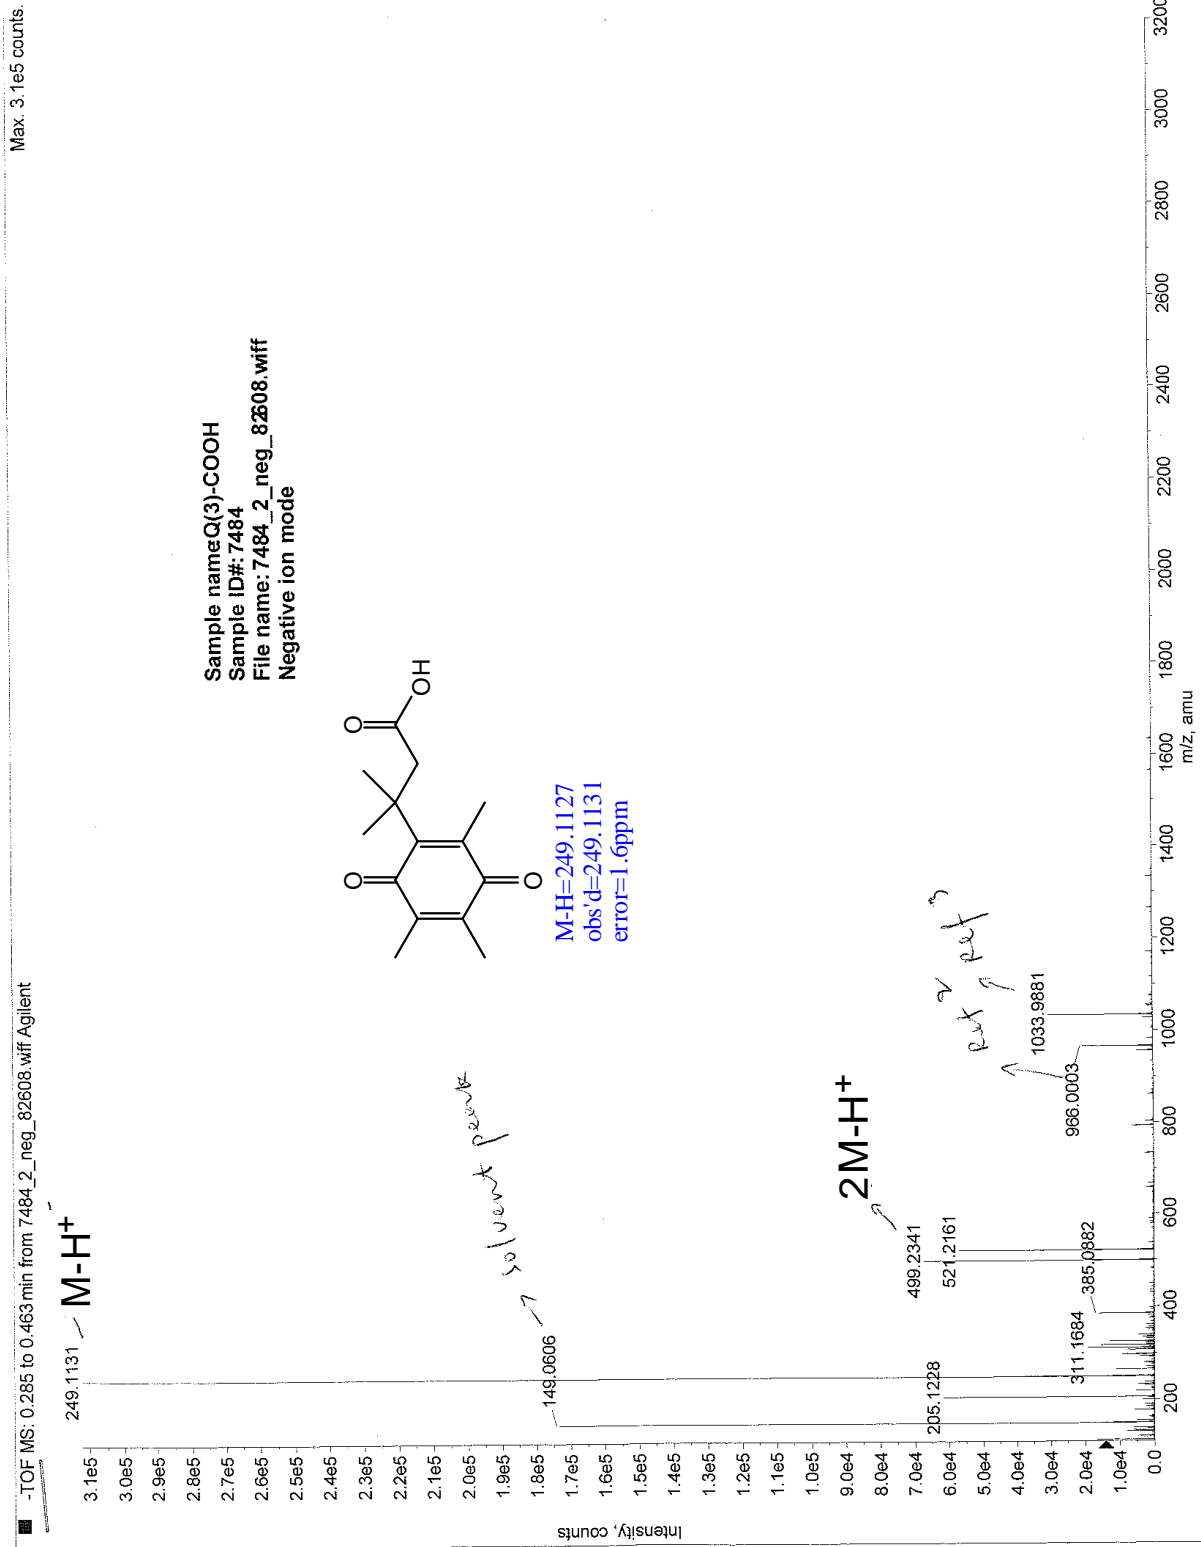

<sup>1</sup>H NMR Spectral Data for 4-Q3

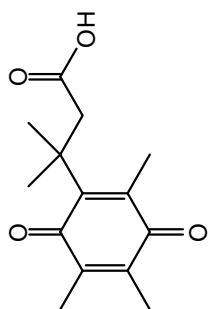

Current Data Parameters  
 NAME Q3-COOH  
 EXNO 1  
 PROCNO 1

F2 - Acquisition Parameters  
 Date 20040908  
 Time 19.30  
 INSTRUM spect  
 PROCNO 5 mm Multinu  
 PULPROG zg  
 TD 35970  
 SOLVENT CDCl3  
 NS 16  
 DS 0  
 SWE 5995.204 Hz  
 FIDRES 0.166672 Hz  
 AQ 2.9998480 sec  
 RG 912.3  
 DW 83.400 usec  
 DB 8.00 usec  
 TE 298.0 K  
 D1 2.0000000 sec

\*\*\*\*\* CHANNEL 1 \*\*\*\*\*  
 NUC1 1H  
 P1 8.00 usec  
 PL3 1.00 dB  
 SFO1 400.1124508 MHz

F2 - Processing parameters  
 SI 65516  
 SF 400.1130094 MHz  
 WDW EM  
 SSB 0  
 LB 0.30 Hz  
 GB 0  
 PC 1.00

1D NMR plot parameters  
 CX 20.00 cm  
 PIP 8.000 ppm  
 F1 3201.04 Hz  
 F2 0.000 ppm  
 PPMCM 0.46000 ppm/cm  
 KZON 160.05200 Hz/cm

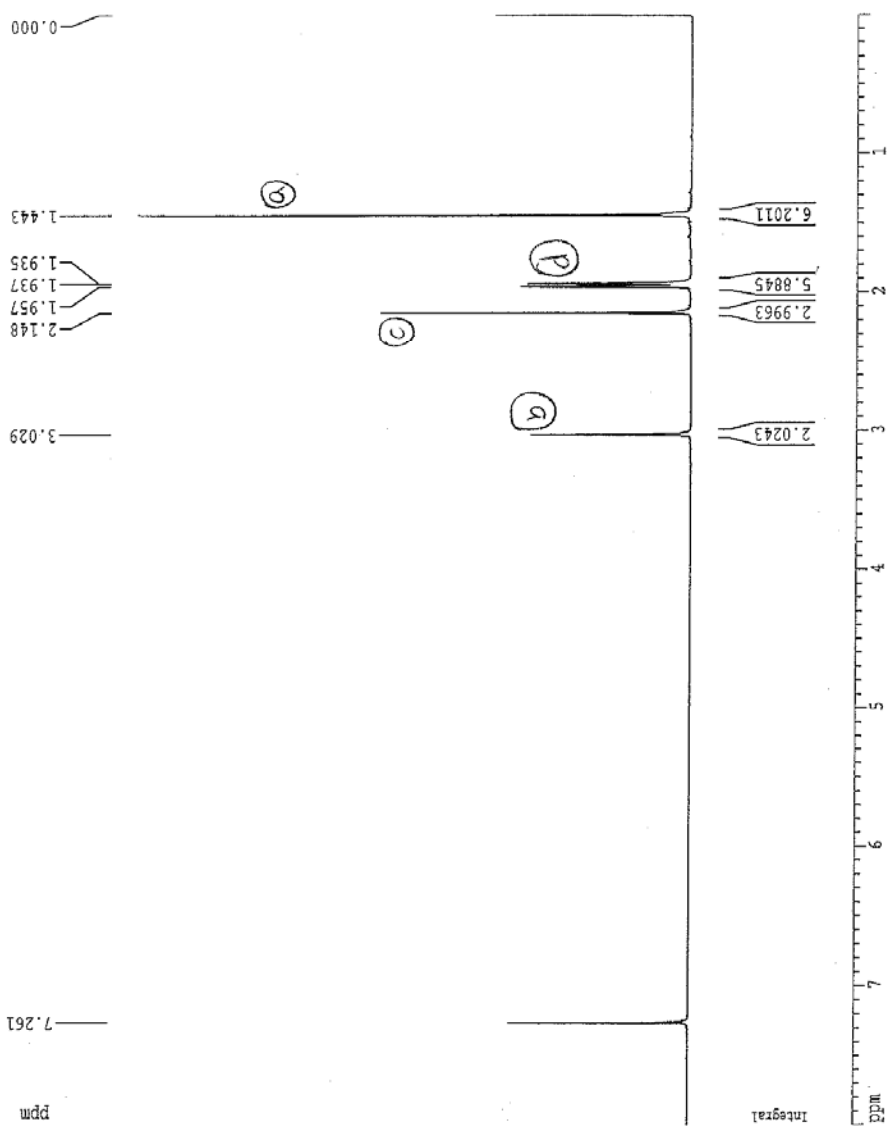

<sup>13</sup>C NMR Spectral Data for 4-Q3

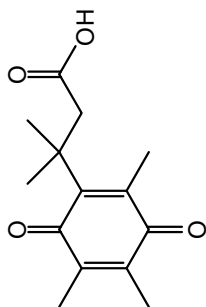

Current Data Parameters  
 NAME Q3-COOH  
 EXPNO 2  
 PROCNO 1

F2 - Acquisition Parameters  
 Date 20041018  
 Time 19.45  
 INSTRUM spect  
 PROBRD 5 mm WCL1  
 PULPROG zgpg30  
 ID 16384  
 SOLVENT CDCl3  
 NS 253  
 DS 2  
 SWH 22727.273 Hz  
 FIDRES 1.387163 Hz  
 AQ 0.3604980 sec  
 RG 32768  
 DW 22.000 usec  
 DE 31.43 usec  
 TE 300.0 K  
 D12 0.0000200 sec  
 DL6 23.00 dB  
 D1 2.00000000 sec  
 CPDPRG waltz16  
 P31 86.00 usec  
 D11 0.0300000 sec  
 DL5 23.00 dB  
 P1 9.00 usec  
 SFCL 75.4751222 MHz  
 NUC13C

F2 - Processing parameters  
 SI 16384  
 SF 75.4677361 MHz  
 MDK EM  
 SSB 0  
 LB 3.00 Hz  
 GB 0  
 PC 1.40

LD RMK plot parameters  
 CX 18.00 cm  
 FIF 200.000 ppm  
 F1 15093.55 Hz  
 F2F 0.000 ppm  
 F2 0.00 Hz  
 PERCM 11.1111 ppm/cm  
 HZCM 836.53033 Hz/cm

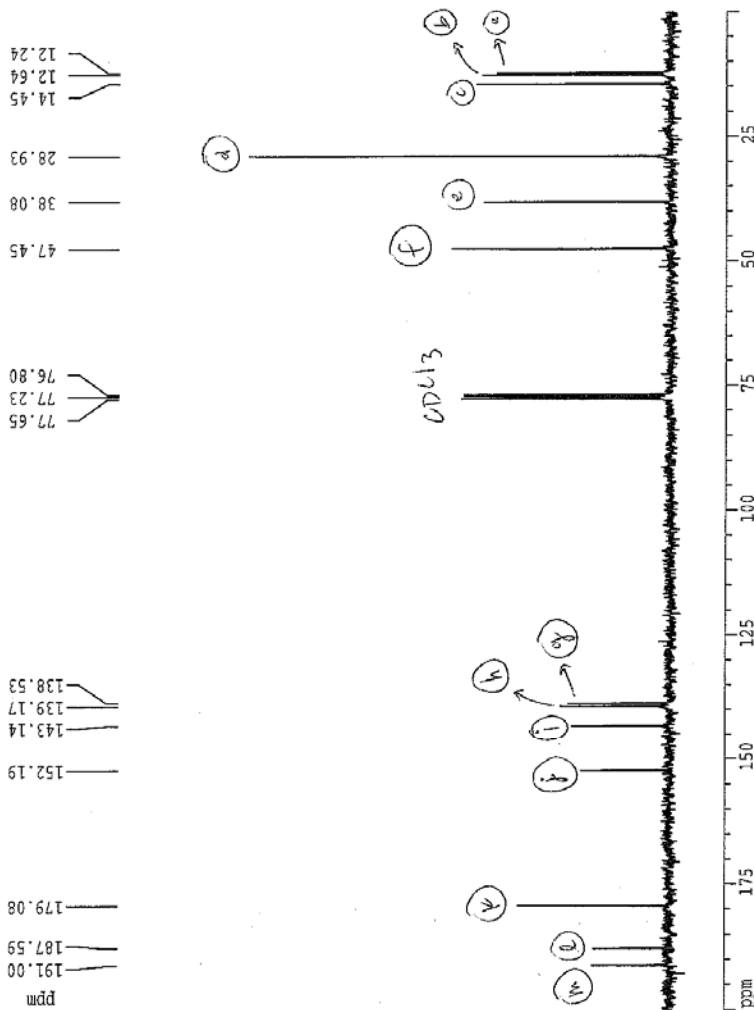

<sup>1</sup>H NMR Spectral Data for 5-Q3

Current Data Parameters  
 NAME Q3-NHS  
 EXNO 1  
 PROCNO 1

F2 - Acquisition Parameters  
 Date 20041115  
 Time 11.44  
 INSTRUM spect  
 PROCNO 5  
 PULPROG zgpg30  
 TD 32768  
 SOLVENT DMSO  
 NS 16  
 DS 0  
 SWH 5995.204 Hz  
 FIDRES 0.166672 Hz  
 AQ 2.9999480 sec  
 RG 143.7  
 DM 83.400 usec  
 DE 8.00 usec  
 TE 298.0 K  
 D1 2.0000000 sec

\*\*\*\*\* CHANNEL \*\*\*\*\*  
 NUC1 1H  
 P1 8.00 usec  
 PL1 1.00 dB  
 SFO1 400.1324508 MHz  
 F2 - Processing parameters  
 SI 65536  
 SF 400.1300083 MHz  
 MDW EM  
 SSB 0  
 LB 0.30 Hz  
 GB 0  
 PC 1.00  
 LD NMR plot parameters  
 CK 20.00 cm  
 FLP 8.000 ppm  
 F1 3201.04 Hz  
 F2 0.000 ppm  
 FZ 0.00 Hz  
 PEAKM 0.46000 ppm/cm  
 HZCM 160.05200 Hz/cm

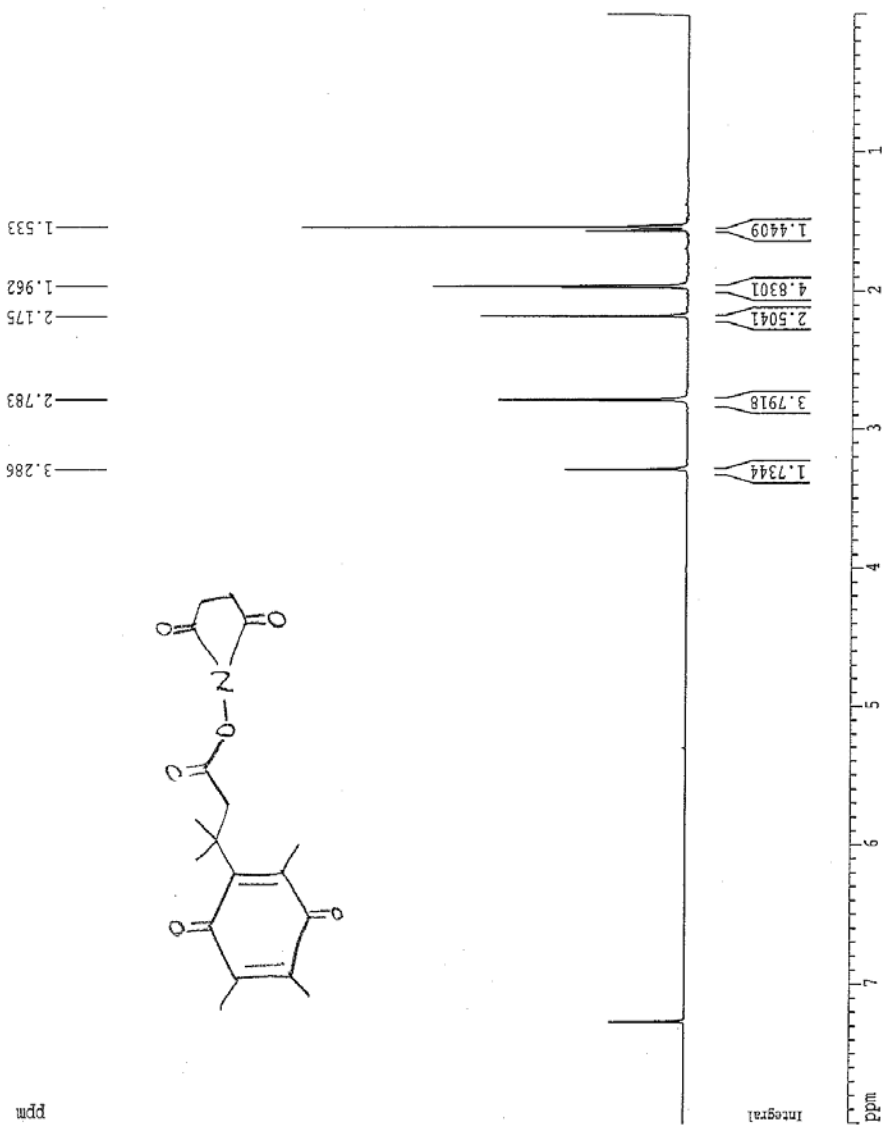



<sup>13</sup>C NMR Spectral Data for 5-Q3

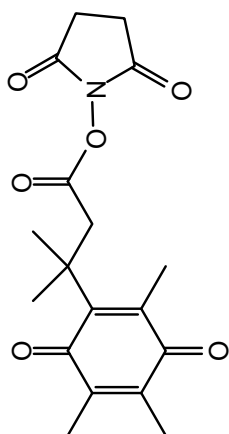

Current Data Parameters  
 NAME Q3-NES  
 EXPRD 2  
 PROCNO 1

F2 - Acquisition Parameters  
 Date 20041018  
 Time 19.25  
 INSTRUM spect  
 PULPROG zgpg30  
 TD 16384  
 SOLVENT CCl3  
 NS 313  
 DS 2  
 SMC 22727.273 Hz  
 F1RES 1.387163 Hz  
 AQ 0.3604980 sec  
 RG 32768  
 DM 22.000 usec  
 DE 31.43 usec  
 TE 300.0 K  
 D12 0.0000200 sec  
 Dd6 23.00 dB  
 D1 2.0000000 sec  
 CPMPRG waltz16  
 P31 86.00 usec  
 D11 0.0300000 sec  
 D15 23.00 dB  
 P1 9.80 usec  
 SFO1 75.4751722 MHz  
 NUC13 13C

F2 - Processing parameters  
 SI 16384  
 SF 75.4677389 MHz  
 WDW EM  
 SSB 0  
 LB 3.00 Hz  
 GB 0  
 PC 1.40

1D NMR plot parameters  
 CX 18.00 cm  
 FAP 200.000 ppm  
 F1 15093.55 Hz  
 F2P 0.000 ppm  
 F2 0.00 Hz  
 PPKCM 11.1111 ppm/cm  
 HECM 636.53033 Hz/cm

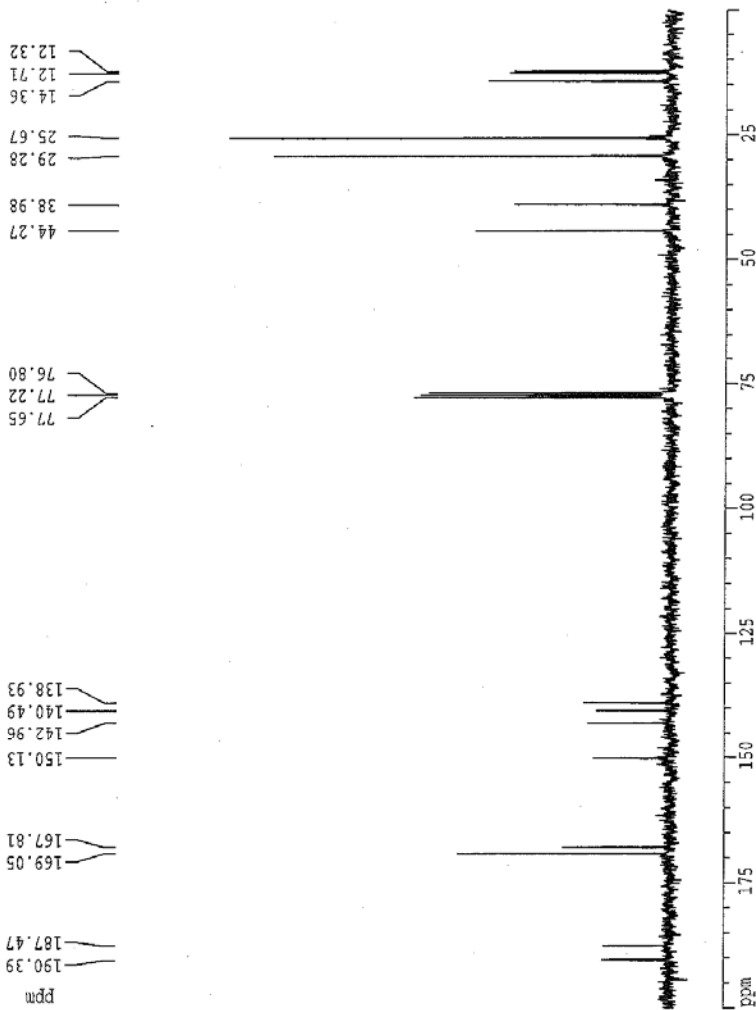

HR-ESI-ToF-MS Data for 2-Q3

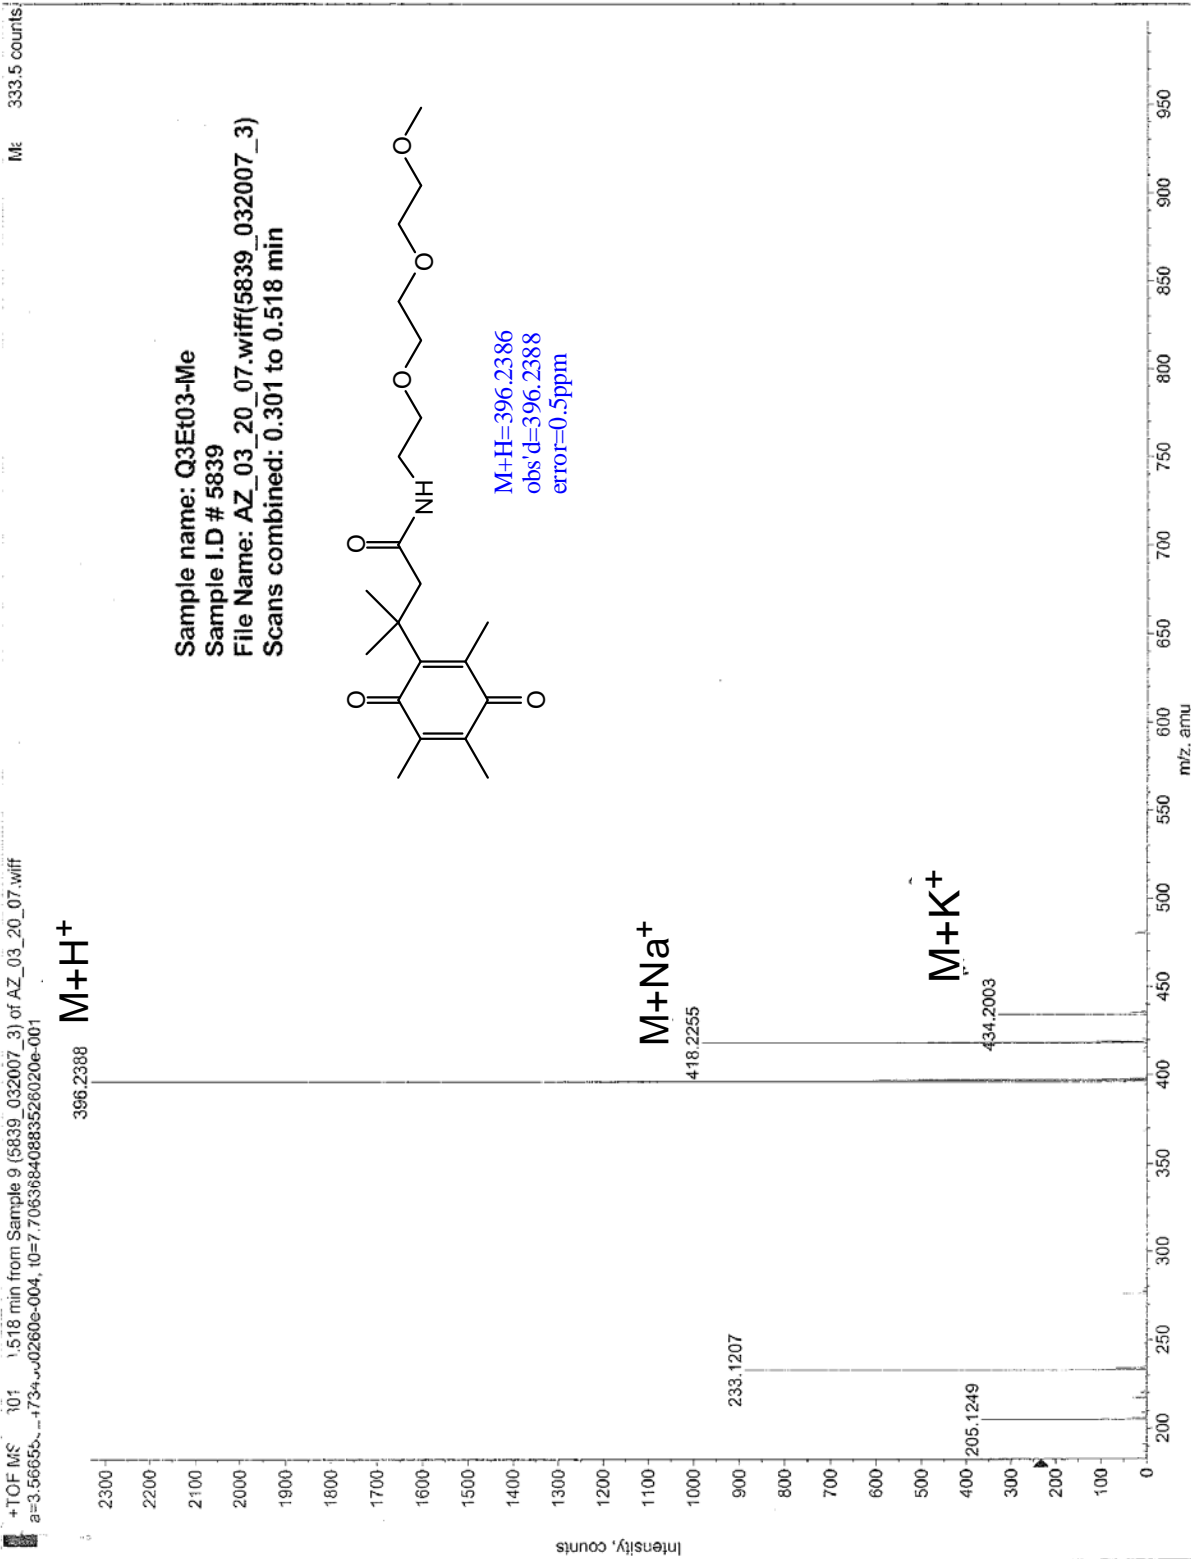

# $^1\text{H}$ NMR Spectral Data for 2-Q3

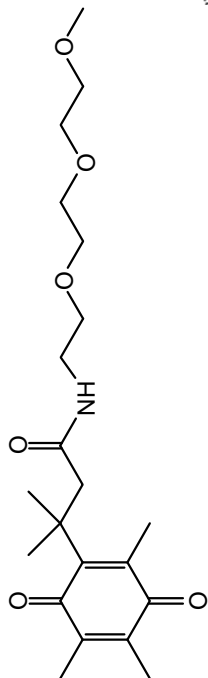

SOLVENT: DMF

EQ03

NAME: Q3-NH-EQ03-Me  
 EXPNO: 1  
 PROCNO: 1  
 Date: 20030628  
 Time: 13.15  
 INSTRUM: spect  
 PROCNO: 5 mm Multinu  
 PULPROG: zg  
 ID: 23960  
 SOLVENT: MeOH  
 NS: 16  
 DS: 0  
 SWH: 5995.204 Hz  
 FIDRES: 0.250008 Hz  
 AQ: 1.9599820 sec  
 RG: 1024  
 DM: 83.400 ussec  
 DE: 8.00 ussec  
 TE: 298.0 K  
 D1: 2.0000000 sec

\*\*\*\*\* CHANNEL f1 \*\*\*\*\*  
 NUC1: 1H  
 P1: 8.00 ussec  
 PL1: 1.00 dB  
 SFO1: 400.1324508 MHz  
 F2 - Processing parameters  
 SI: 65536  
 SF: 400.1300080 MHz  
 WDW: EM  
 SSB: 0  
 LB: 0.30 Hz  
 GB: 0  
 PC: 1.00  
 LD NMR plot parameters  
 CX: 20.00 cm  
 F1: 8.000 ppr  
 FL: 3201.04 Hz  
 F2: 0.000 ppm  
 FZ: 0.00 Hz  
 PPMCM: 0.40000 ppm/cm  
 HZCM: 160.05200 Hz/cm

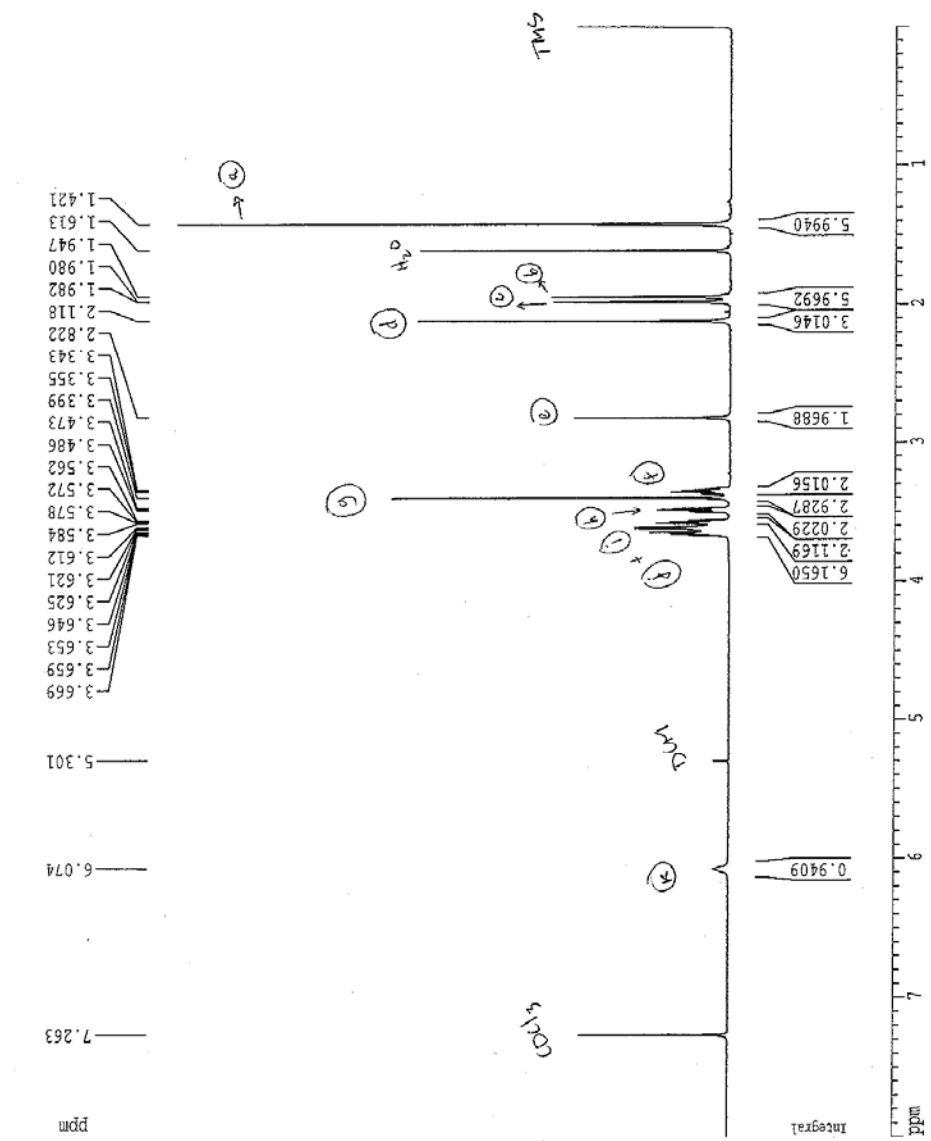

<sup>13</sup>C NMR Spectral Data for 2-Q3

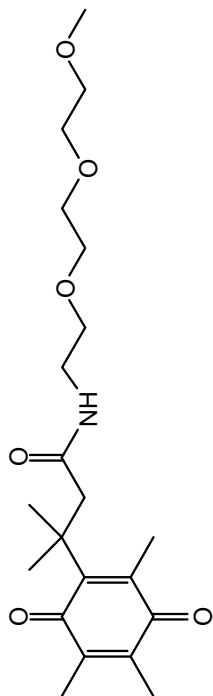

Current Data Parameters  
 NAME Q3-NH-FL03Me  
 EXNO 2  
 PROCNO 1

F2 - Acquisition Parameters  
 Date\_ 20050715  
 Time 15.22  
 INSTRUM spect  
 PROCNO 5 mm Multi  
 PULPROG zgpg30  
 ID 16384  
 CCCL3  
 SOLVENT 20000  
 NS 2  
 DS 2  
 SMH 22727.273 Hz  
 FIDRES 1.387763 Hz  
 AQ 0.3664680 sec  
 RG 32768  
 DM 22.400 usec  
 DE 11.43 usec  
 TE 300.0 K  
 D12 0.0000200 sec  
 DL6 23.00 GB  
 D1 2.0000000 sec  
 CTEPRG waltz16  
 P31 86.00 usec  
 D11 0.0300000 sec  
 D15 23.00 dB  
 P1 9.80 usec  
 SFO1 75.4751777 MHz  
 NUCLEUS <sup>13</sup>C

F2 - Processing parameters  
 SI 16384  
 SF 75.4677361 MHz  
 WDN 0  
 SSB 0  
 LB 3.00 Hz  
 GB 0  
 PC 1.40

1D NMR plot parameters  
 CX 18.00 cm  
 F1F 200.000 ppm  
 F1 15093.55 Hz  
 F2F 0.000 ppm  
 F2 0.00 Hz  
 PRGM 11.11111 ppm/cm  
 HZCN 838.53033 Hz/cm

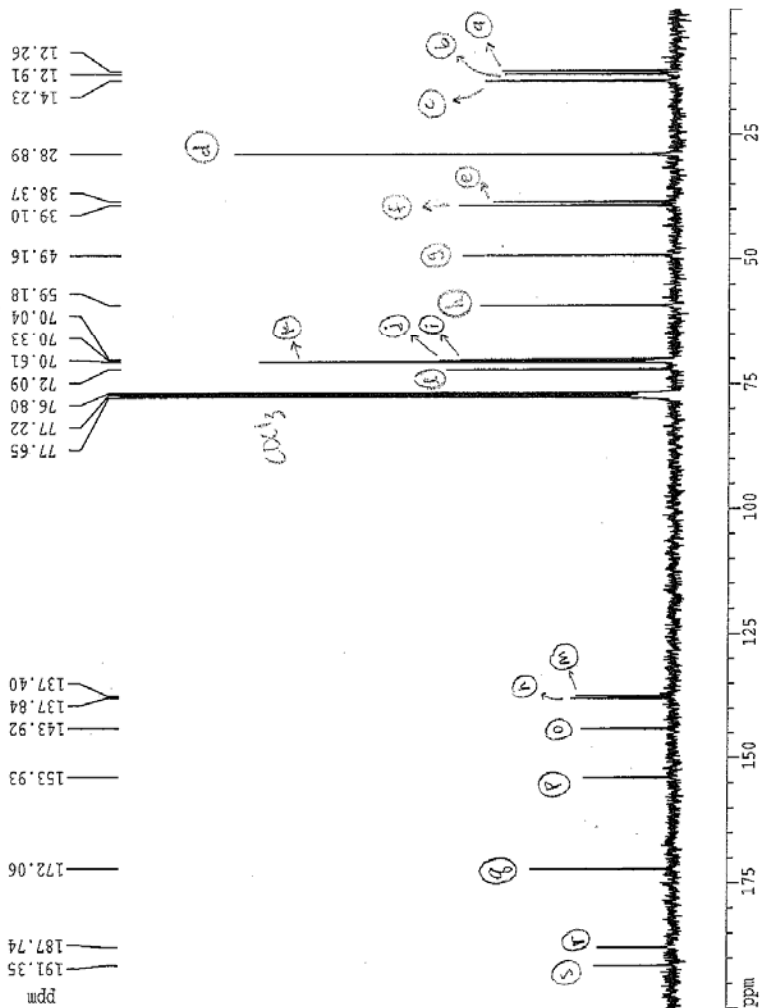

# HR-ESI-ToF-MS Data for 1-Q3

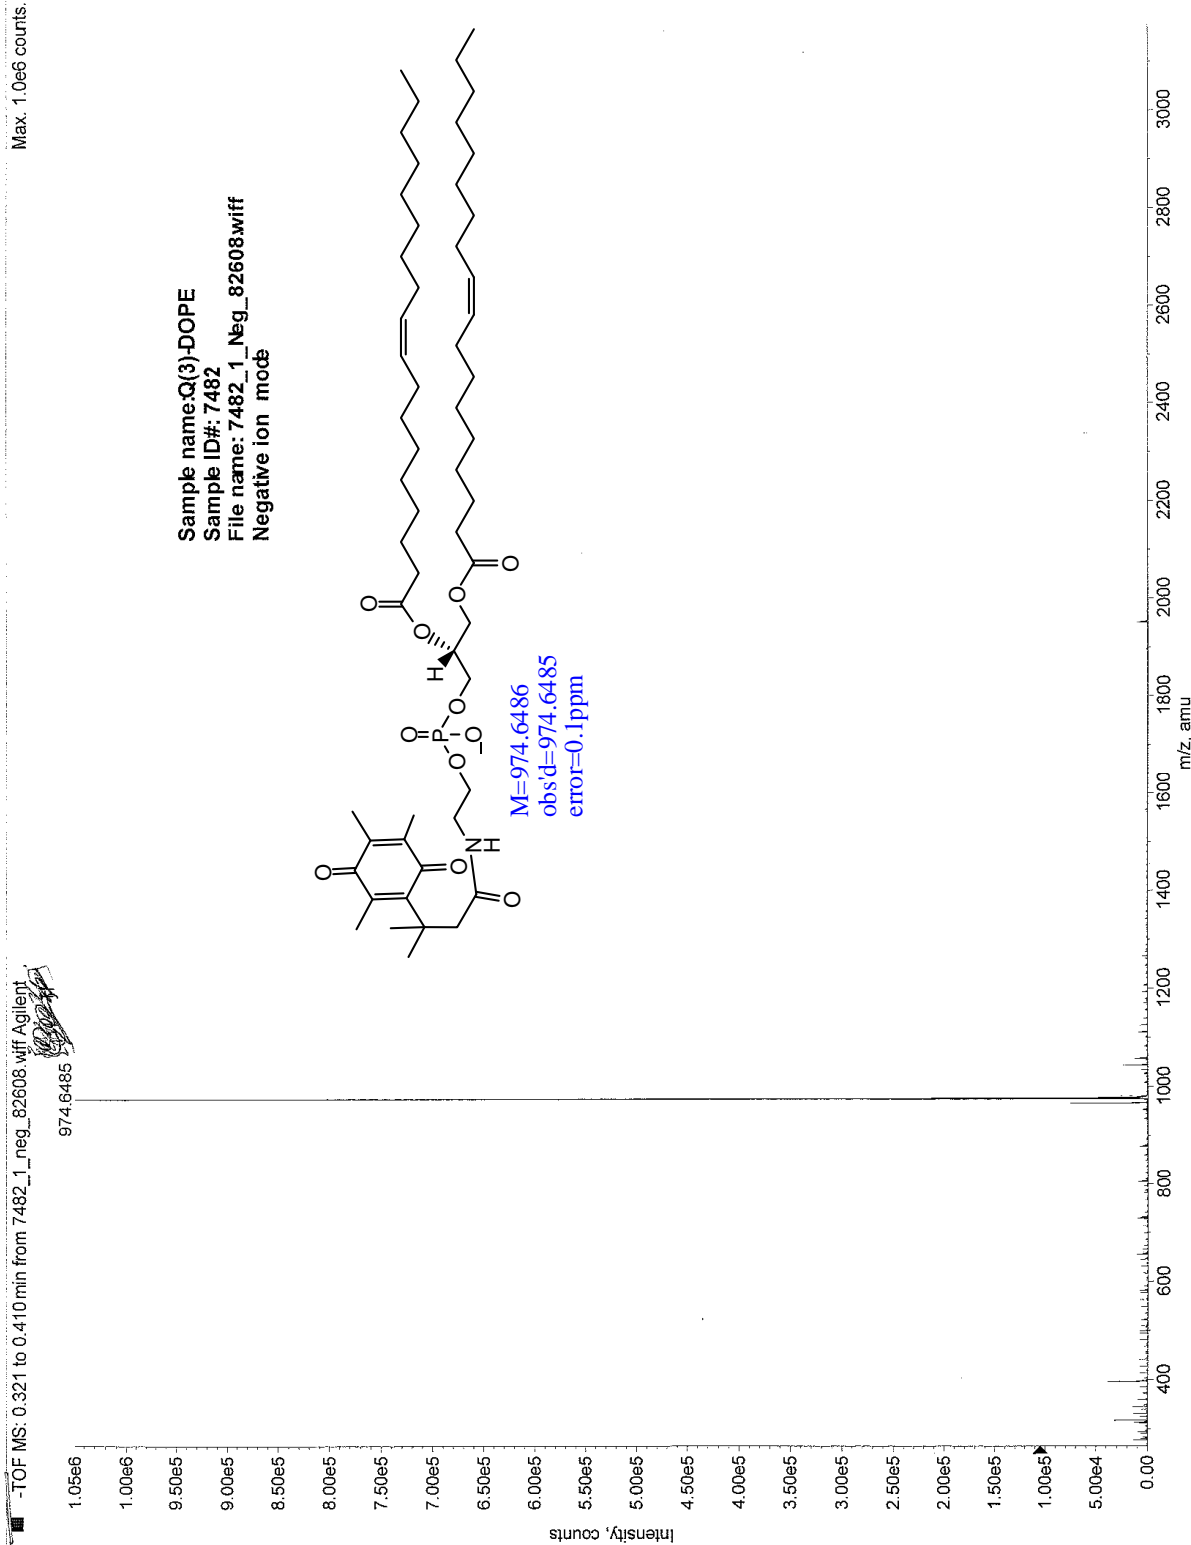

# <sup>1</sup>H NMR Spectral Data for 1-Q3

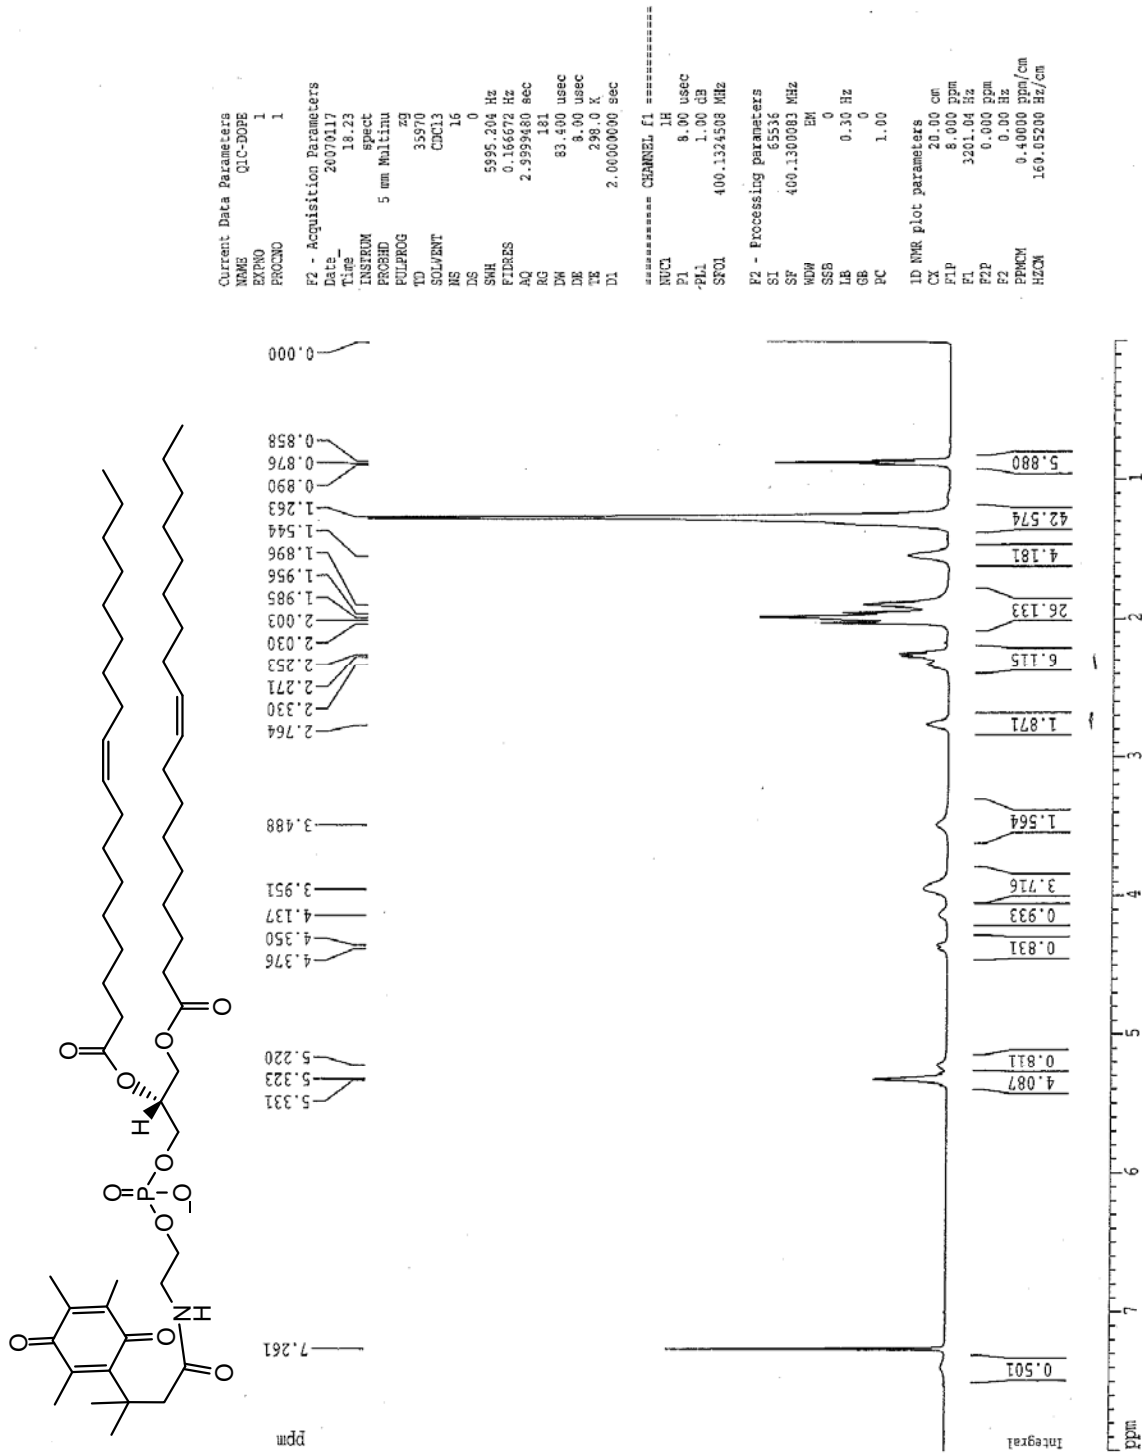

<sup>13</sup>C NMR Spectral Data for 1-Q3

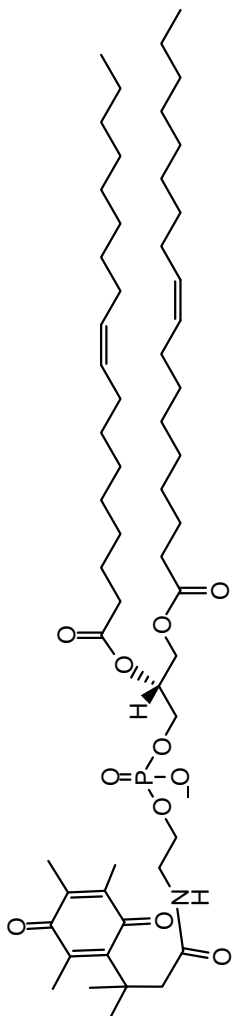

Current Data Parameters  
 NAME Q3-D0PE  
 EXNO 3  
 PROCNO 1

F2 - Acquisition Parameters  
 Date 20060215  
 Time 18:52  
 INSTRUM spect  
 PROCNO 5 mm Multi  
 PULPROG zgpg30  
 TD 65536  
 SFO1 125.761 MHz  
 SOLVENT CDCl3  
 NS 19500  
 DS 2  
 SWH 22727.273 Hz  
 FIDRES 1.387163 Hz  
 AQ 0.3604980 sec  
 RG 32768  
 DW 22.000 usec  
 DE 11.43 usec  
 TE 300.0 K  
 D12 0.000200 sec  
 D16 23.00 dB  
 D1 2.0000000 sec  
 CPDPRG waltz16  
 P11 86.00 usec  
 D11 0.0300000 sec  
 D15 23.00 dB  
 P1 9.80 usec  
 SFO1 75.4751727 MHz  
 NUCLEUS <sup>13</sup>C

F2 - Processing parameters  
 SI 15384  
 SF 75.4677347 MHz  
 WDM EM  
 SSB 0  
 LB 5.00 Hz  
 GB 0  
 FC 1.40

1D NMR plot parameters  
 CX 18.00 cm  
 F1P 200.000 ppm  
 F1 15093.55 Hz  
 F2P 0.000 ppm  
 F2 0.00 Hz  
 PPM0W 11.1111 ppm/cm  
 HZCM 838.53033 Hz/cm

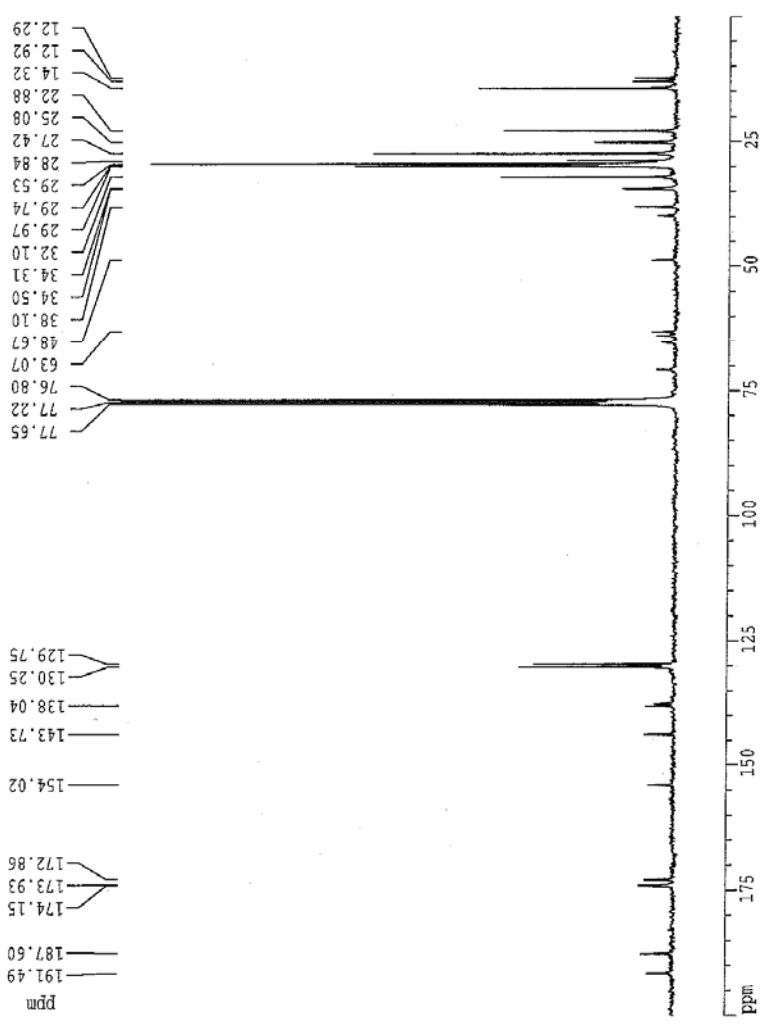

Supplement: NIHMS80201-supplement-Supporting_Inf.pdf [file NIHMS80201-supplement-Supporting_Inf.pdf]
